# Supplementary material for: Reversible chemoselective transetherification of vinylogous esters using Fe-catalyst under additive free conditions
Source: Royal Society of Chemistry journal article supplement (doi:10.1039/c9ob00307j), 2019-01-01

Supporting Information

## **Reversible Chemoselective Transesterification of Vinylogous Ester Using Fe-Catalyst under Additive Free Condition**

Nenavath Parvathalu,<sup>‡</sup> Sandip G. Agalave,<sup>‡</sup> Nirmala Mohanta and Boopathy  
Gnanaprakasam\*

Department of Chemistry, Indian Institute of Science Education and Research  
Pune-411008, India

E-mail: [gnanaprakasam@iiserpune.ac.in](mailto:gnanaprakasam@iiserpune.ac.in)

### **Table of Contents**

|                                                      | <b>Pages</b> |
|------------------------------------------------------|--------------|
| 1. Continuous flow set up                            | S-2          |
| 2. Synthetic utility of vinylogous esters            | S-2          |
| 3. Copy of the spectra for the synthesized compounds | S-3 to S-24  |

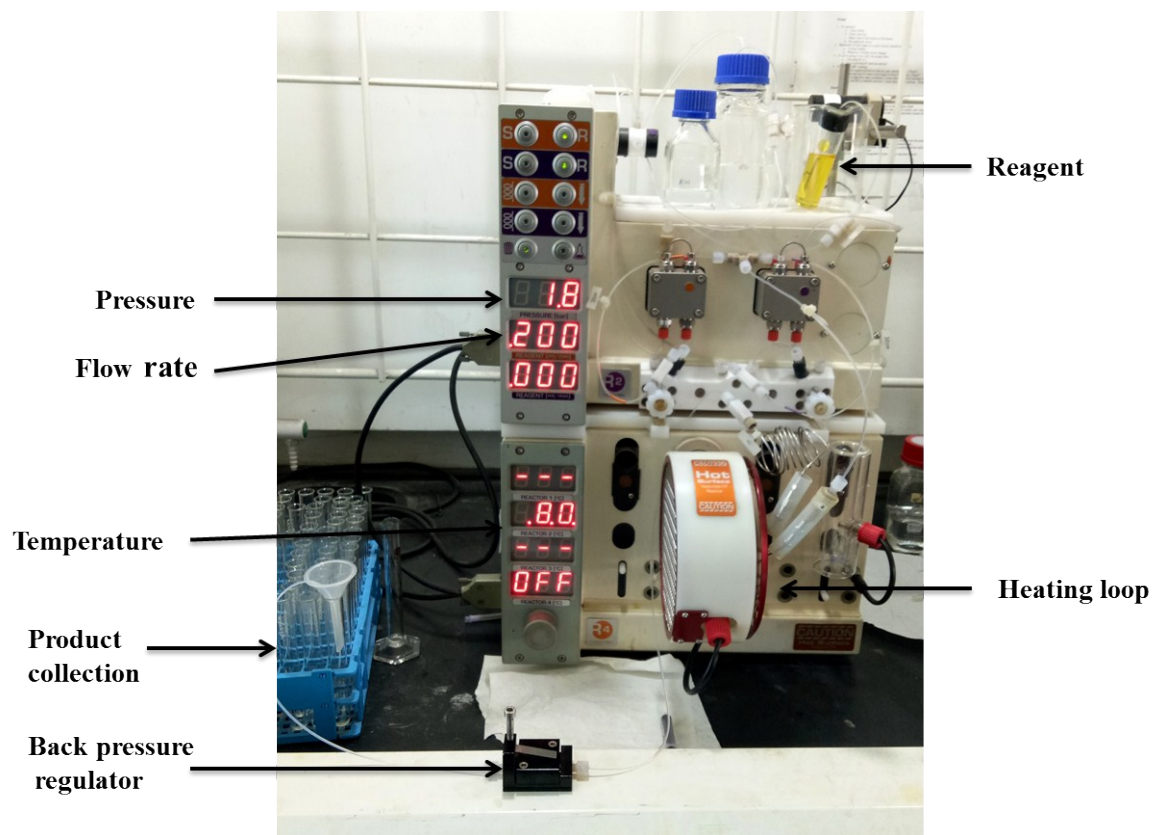

**Figure S1.** A continuous flow set up for tranesterification reaction

**Copy of the spectra for the synthesized compounds:**

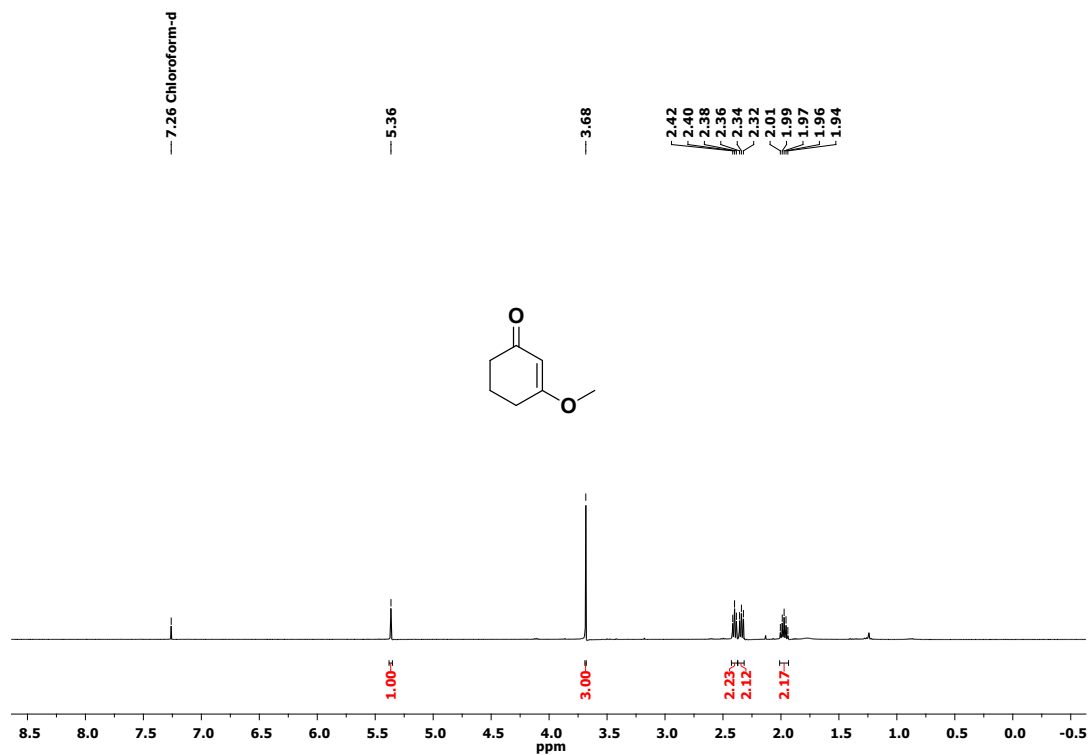

$^1\text{H}$  NMR of **2a**, 400 MHz,  $\text{CDCl}_3$

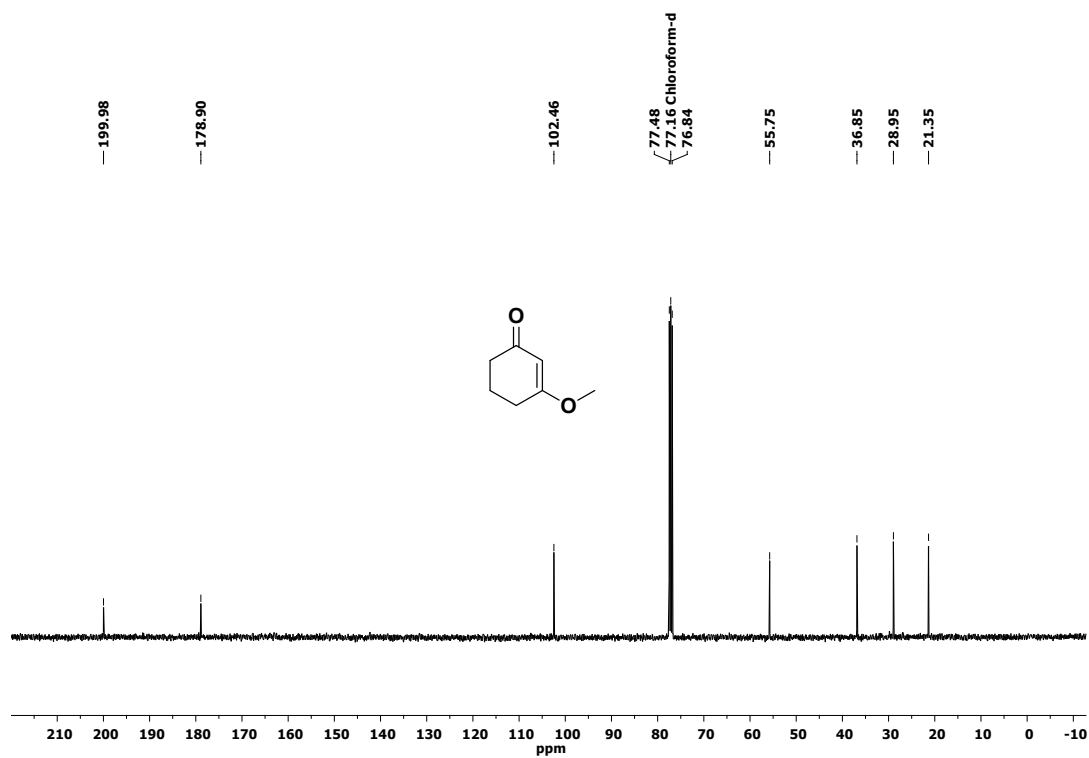

$^{13}\text{C}$  NMR of **2a**, 100 MHz,  $\text{CDCl}_3$

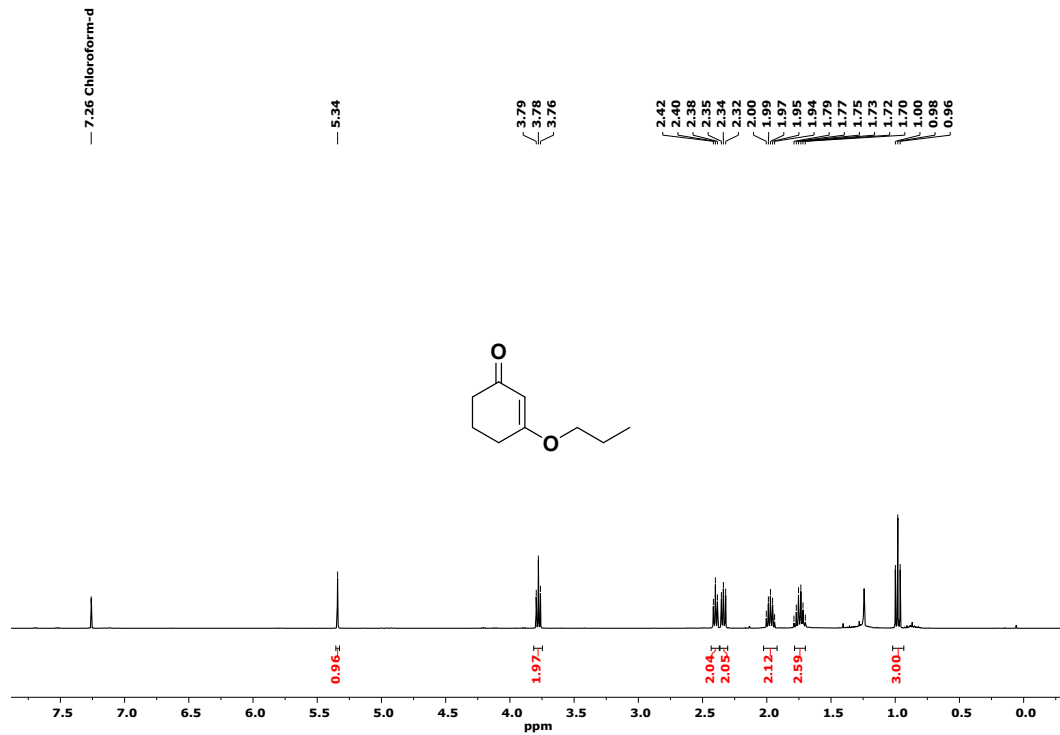

$^1\text{H}$  NMR of **2b**, 400 MHz,  $\text{CDCl}_3$

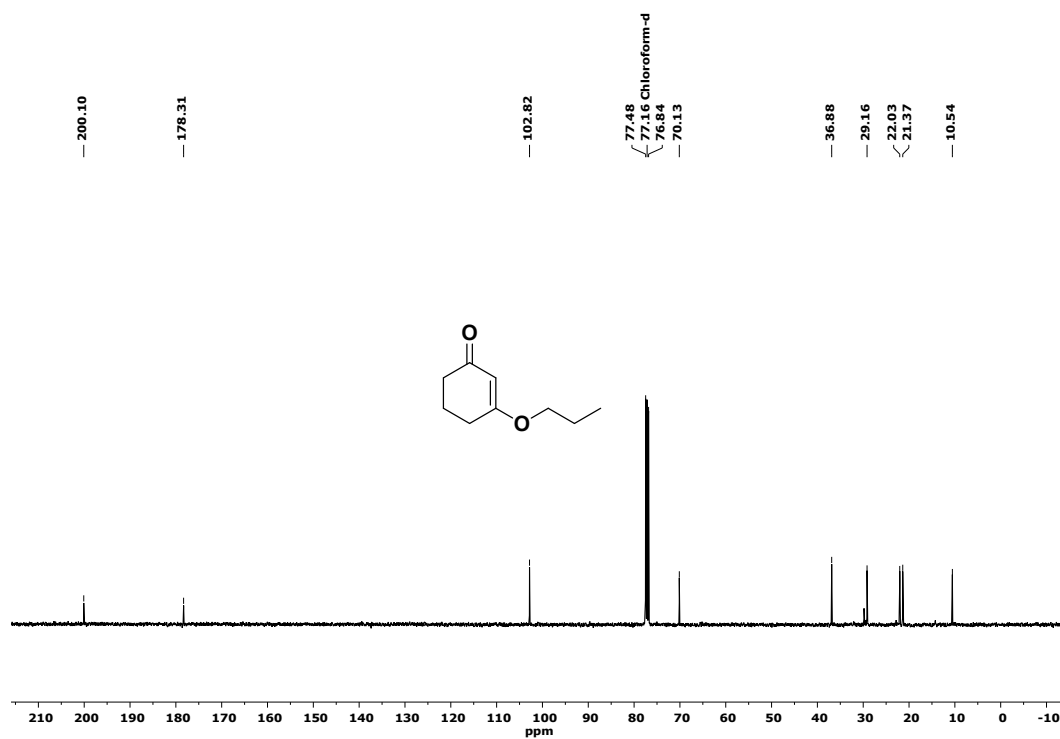

$^{13}\text{C}$  NMR of **2b**, 100 MHz,  $\text{CDCl}_3$

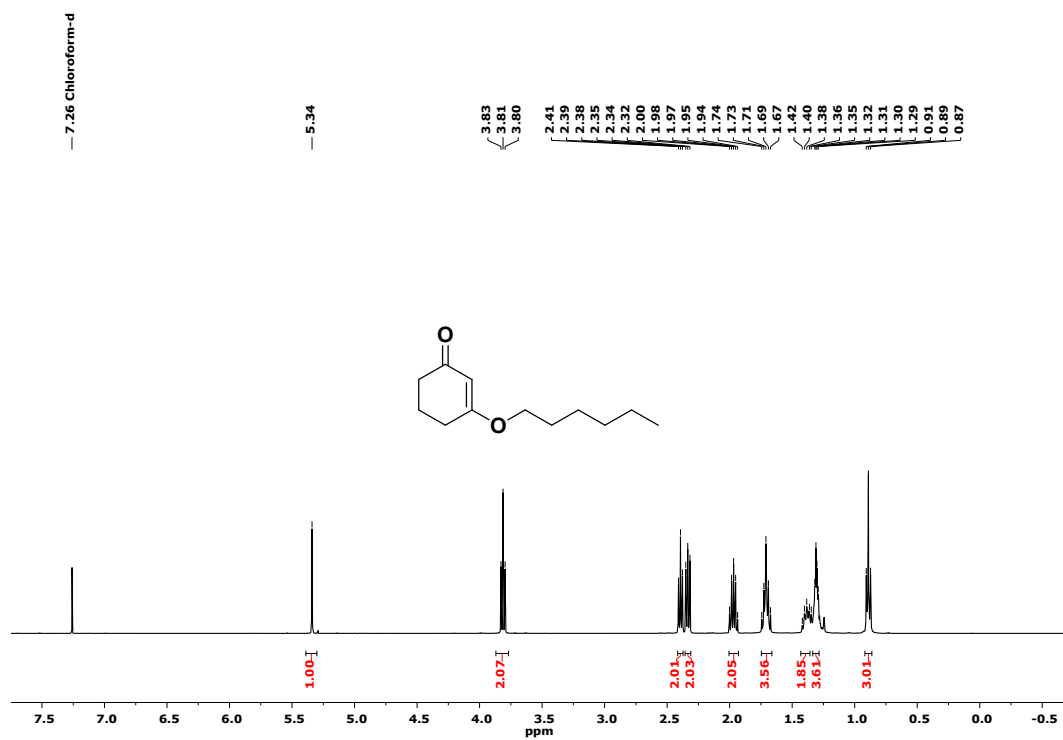

$^1\text{H}$  NMR of **2c**, 400 MHz,  $\text{CDCl}_3$

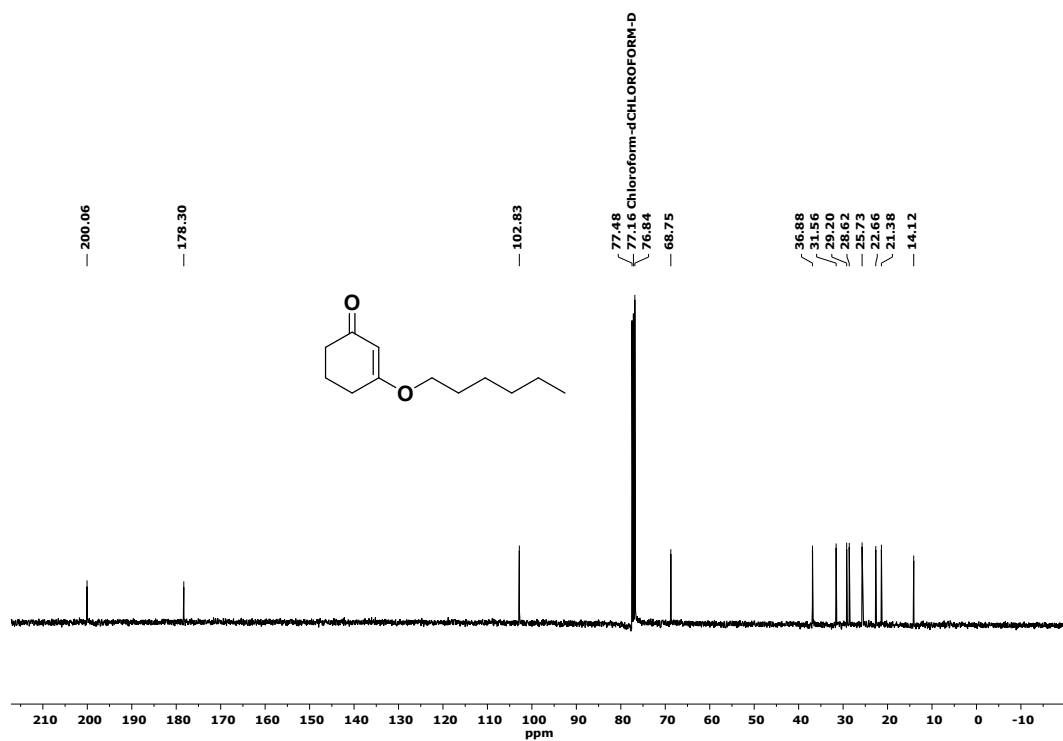

$^{13}\text{C}$  NMR of **2c**, 100 MHz,  $\text{CDCl}_3$

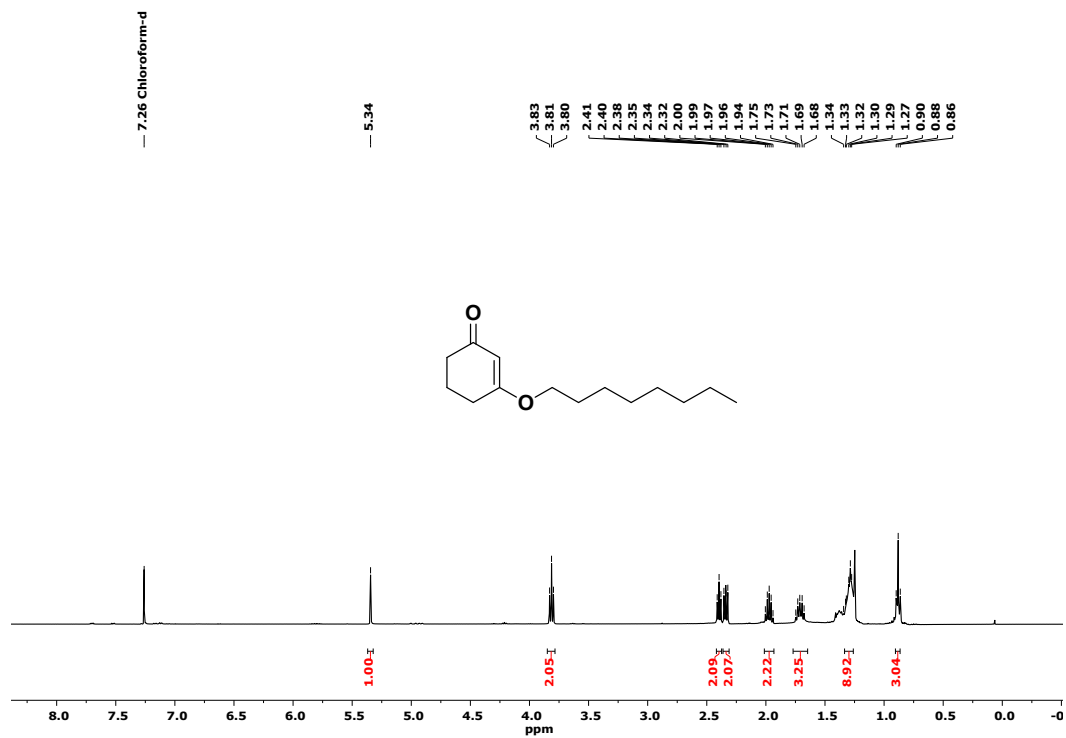

$^1\text{H}$  NMR of **2d**, 400 MHz,  $\text{CDCl}_3$

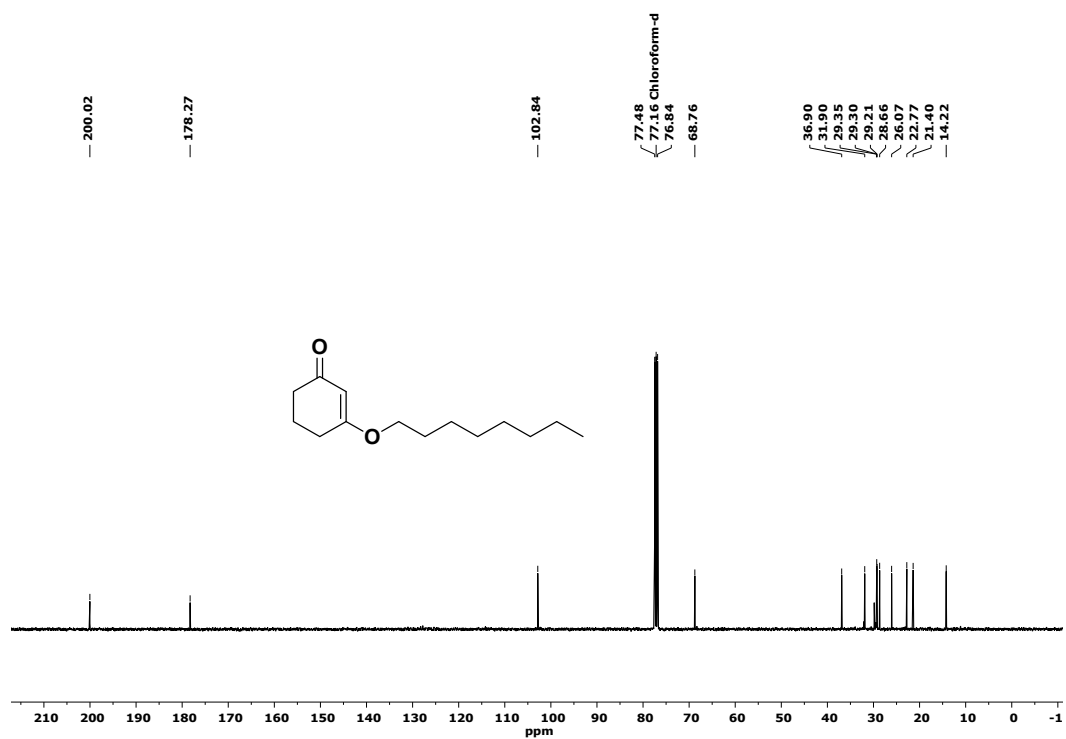

$^{13}\text{C}$  NMR of **2d**, 100 MHz,  $\text{CDCl}_3$

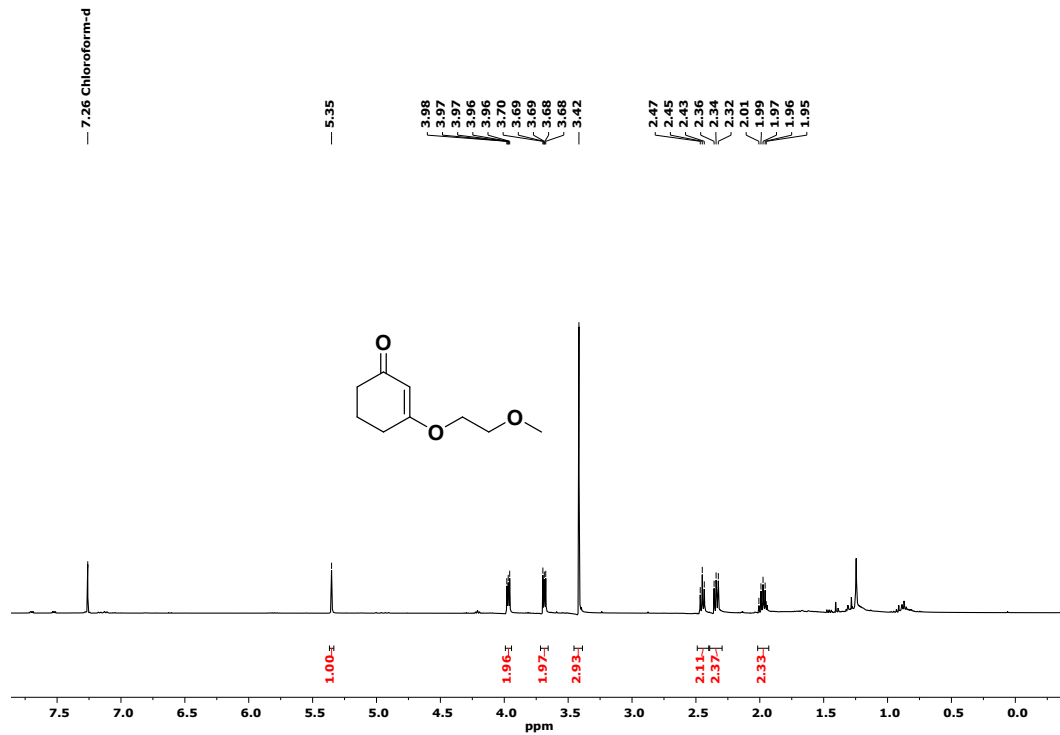

$^1\text{H}$  NMR of **2e**, 400 MHz,  $\text{CDCl}_3$

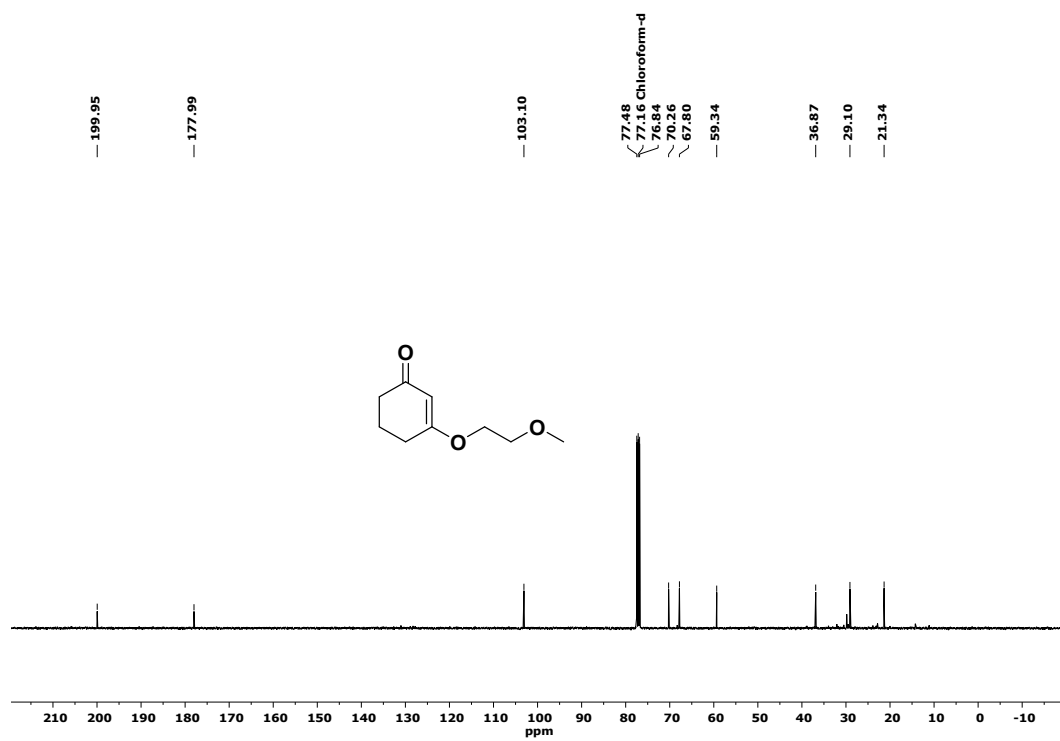

$^{13}\text{C}$  NMR of **2e**, 100 MHz,  $\text{CDCl}_3$

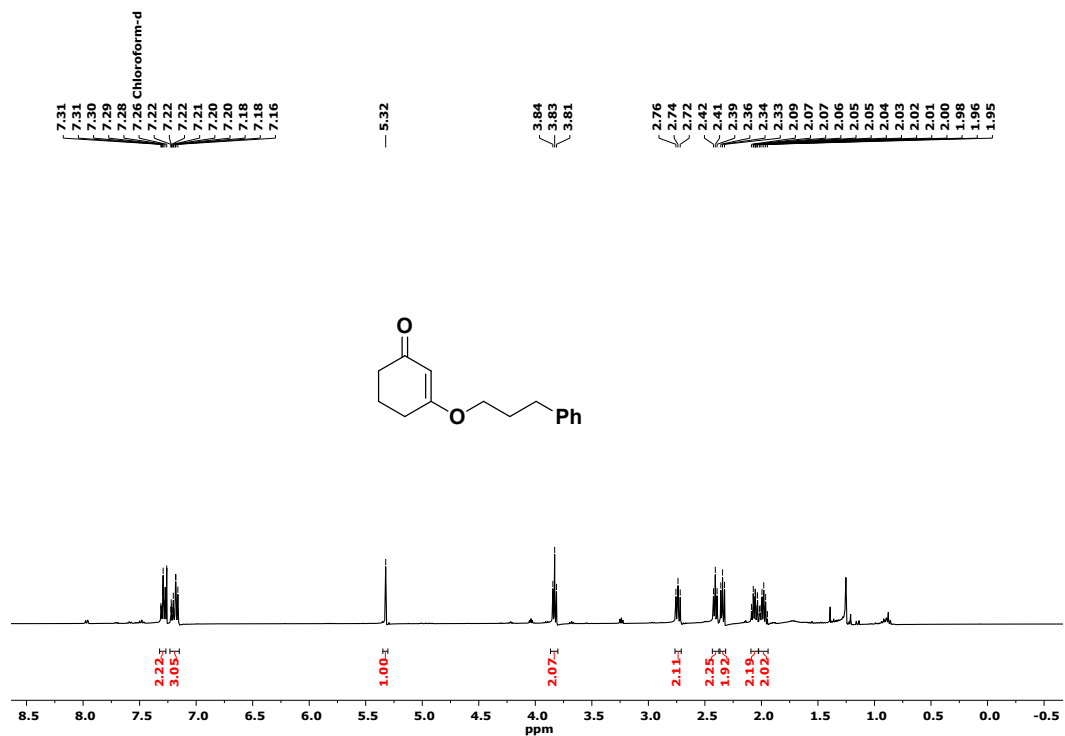

<sup>1</sup>H NMR of **2f**, 400 MHz, CDCl<sub>3</sub>

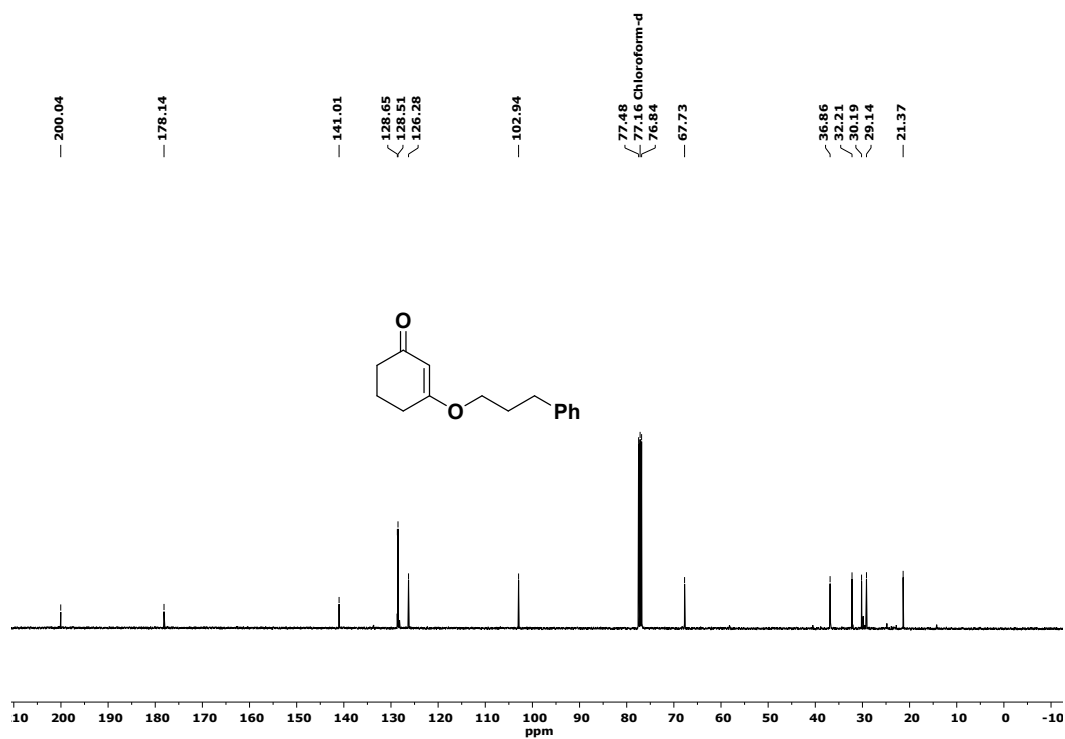

<sup>13</sup>C NMR of **2f**, 100 MHz, CDCl<sub>3</sub>



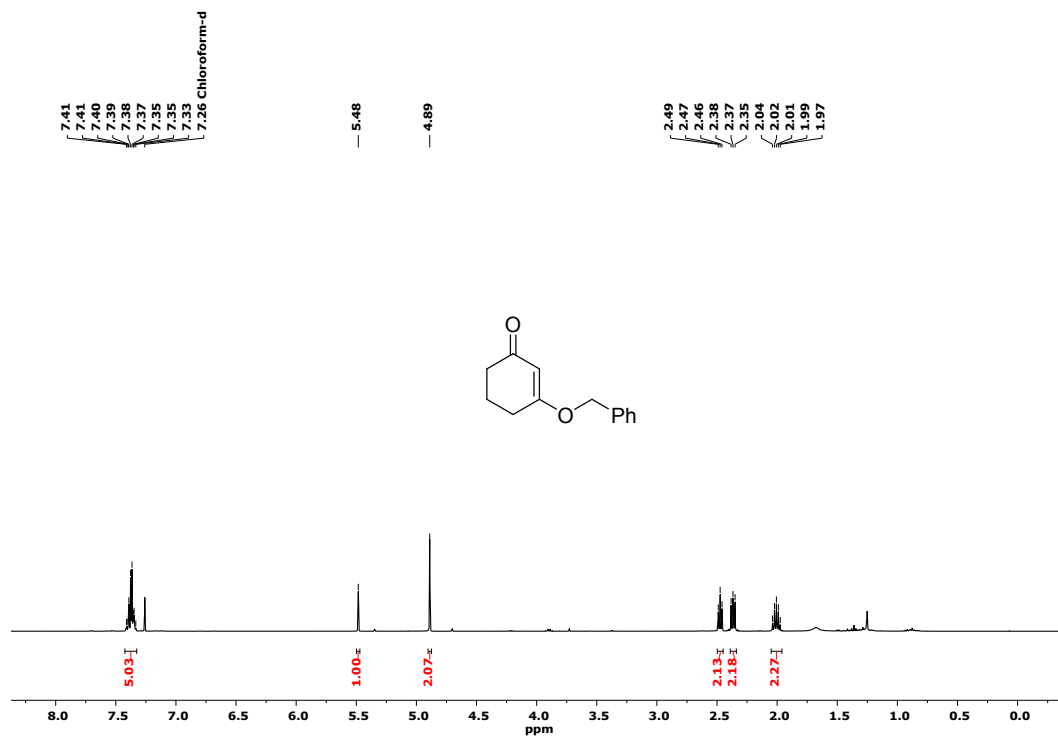

<sup>1</sup>H NMR of **2g**, 400 MHz, CDCl<sub>3</sub>

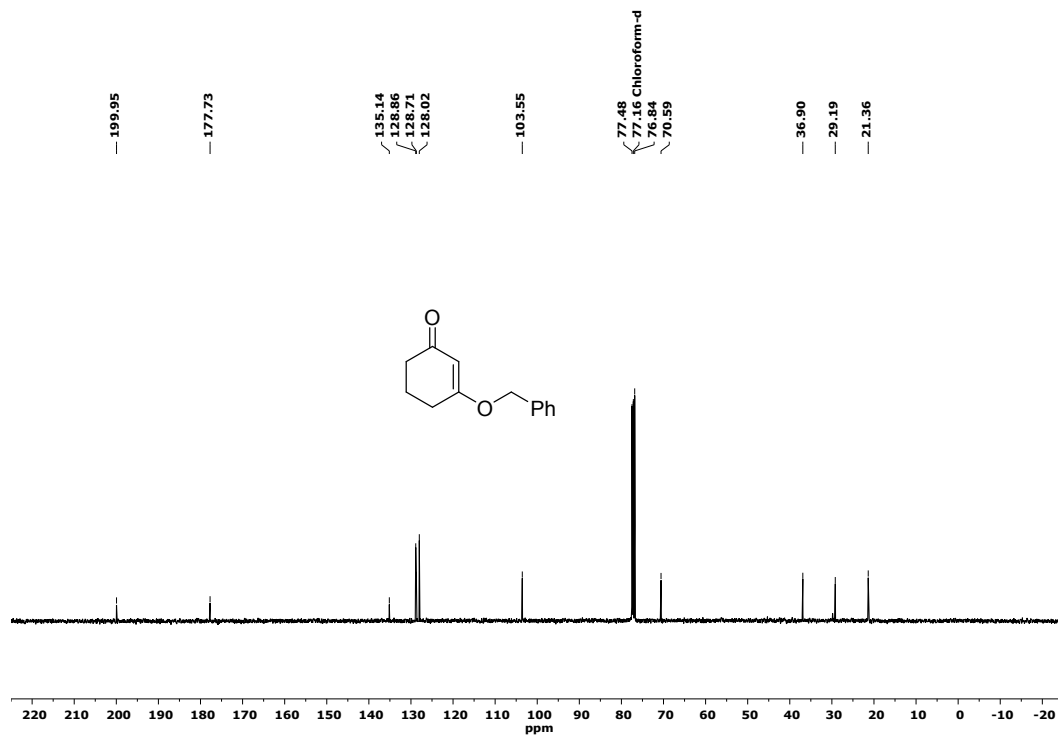

<sup>13</sup>C NMR of **2g**, 100 MHz, CDCl<sub>3</sub>

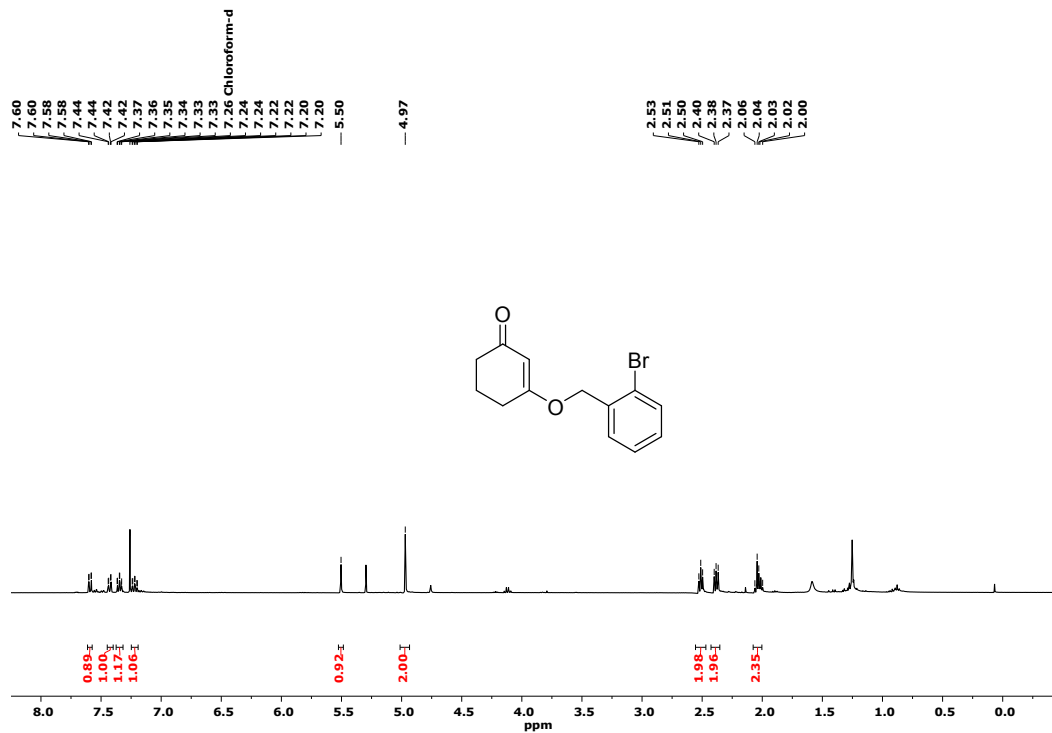

<sup>1</sup>H NMR of **2h**, 400 MHz, CDCl<sub>3</sub>

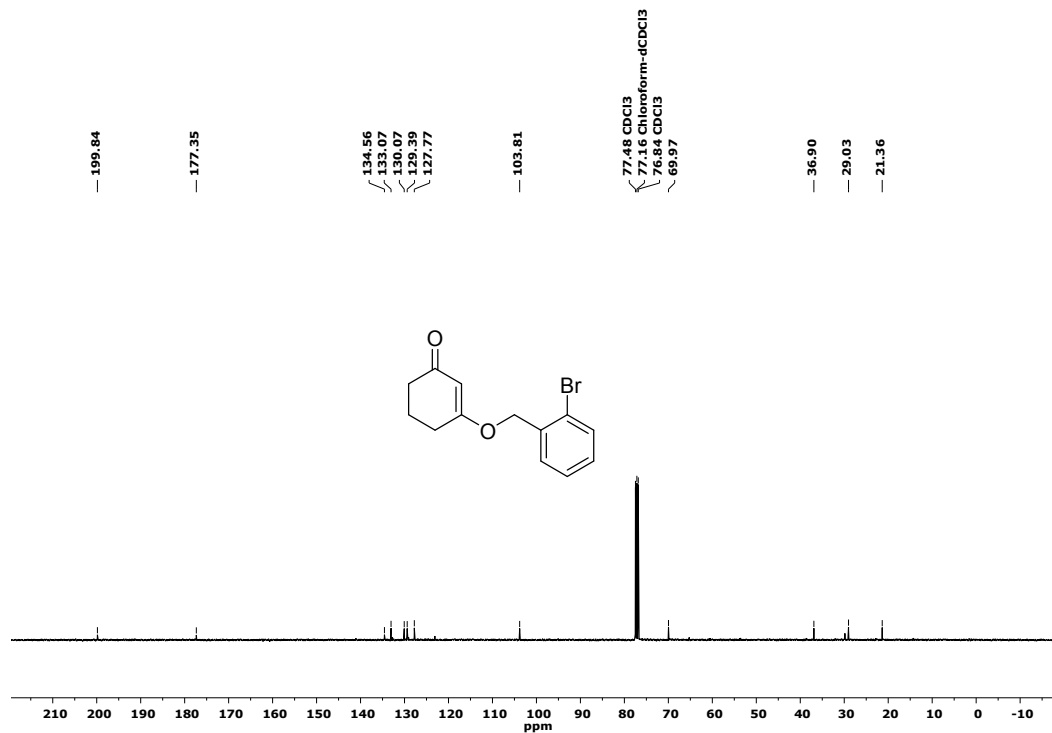

<sup>13</sup>C NMR of **2h**, 100 MHz, CDCl<sub>3</sub>

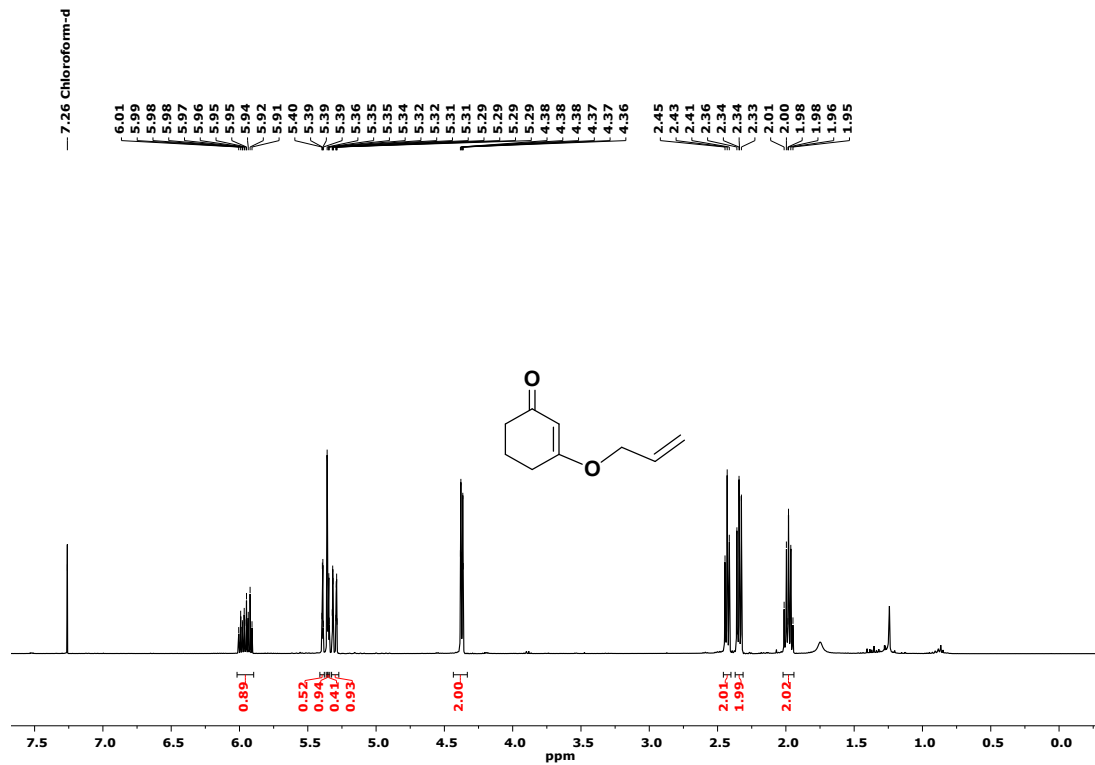

$^1\text{H}$  NMR of **2i**, 400 MHz,  $\text{CDCl}_3$

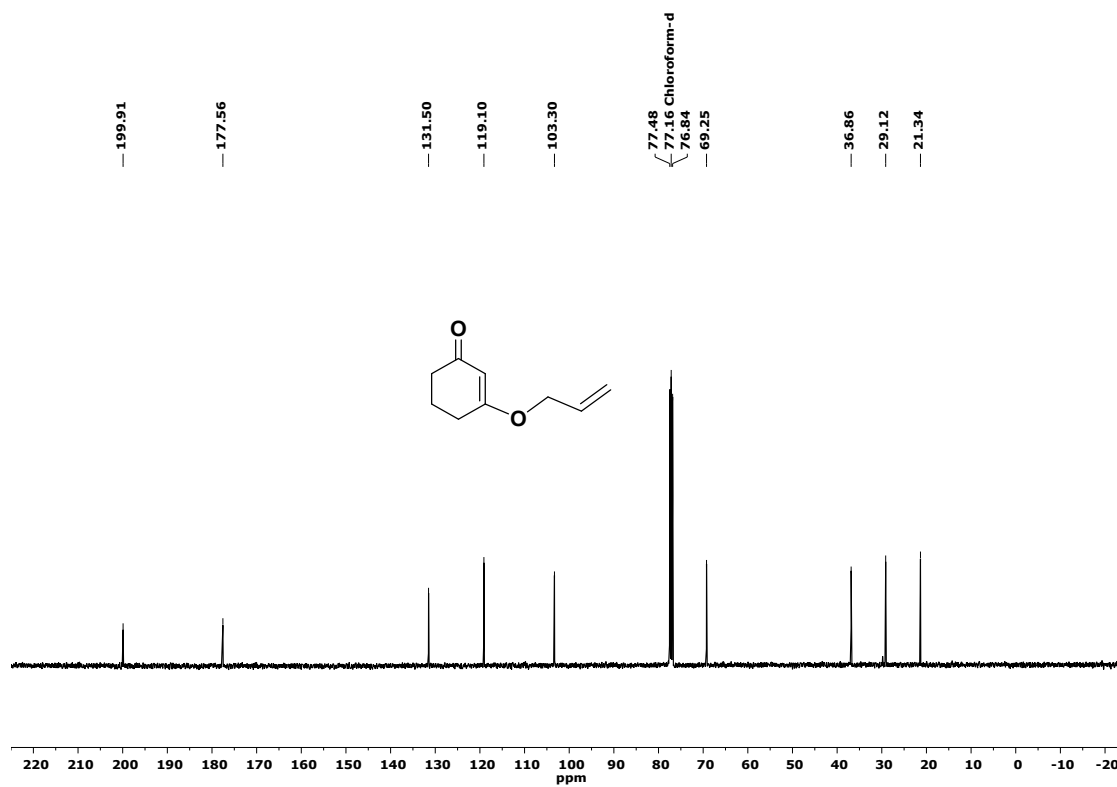

$^{13}\text{C}$  NMR of **2i**, 100 MHz,  $\text{CDCl}_3$

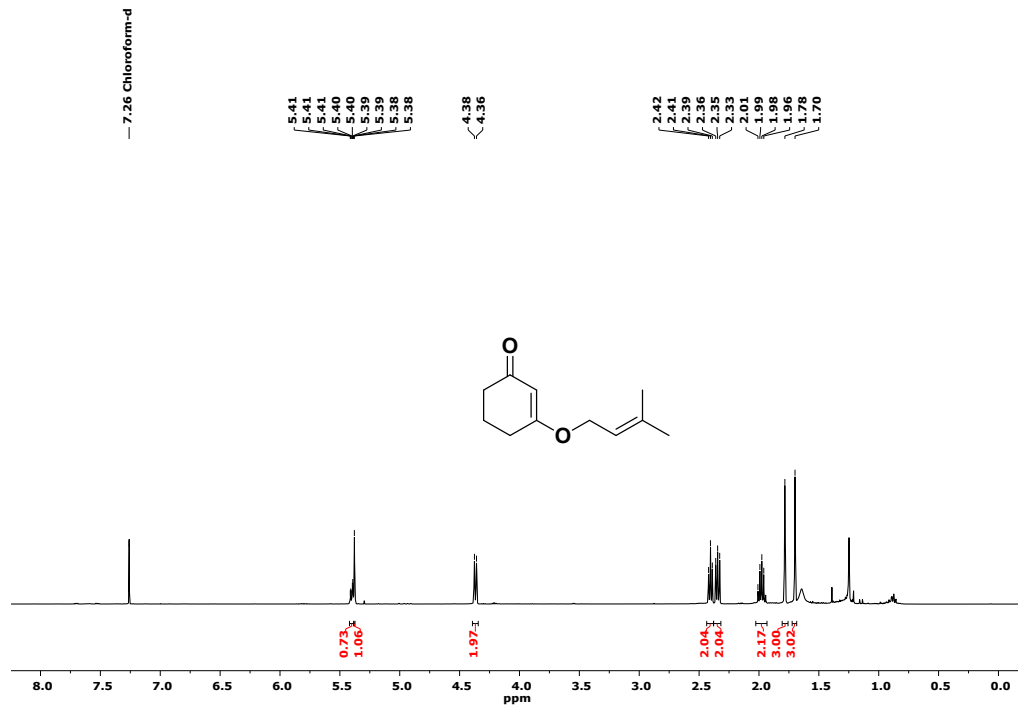

$^1\text{H}$  NMR of **2j**, 400 MHz,  $\text{CDCl}_3$

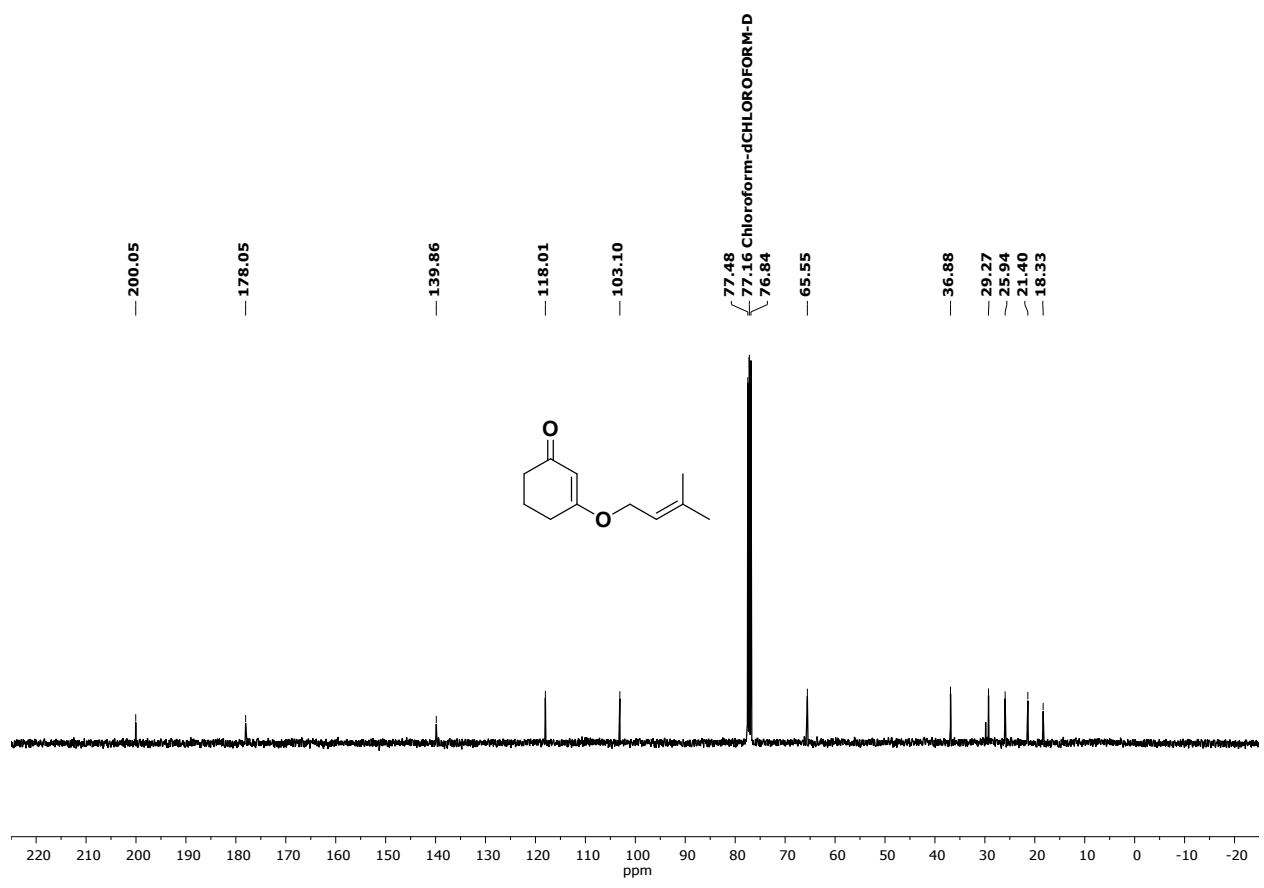

$^{13}\text{C}$  NMR of **2j**, 100 MHz,  $\text{CDCl}_3$

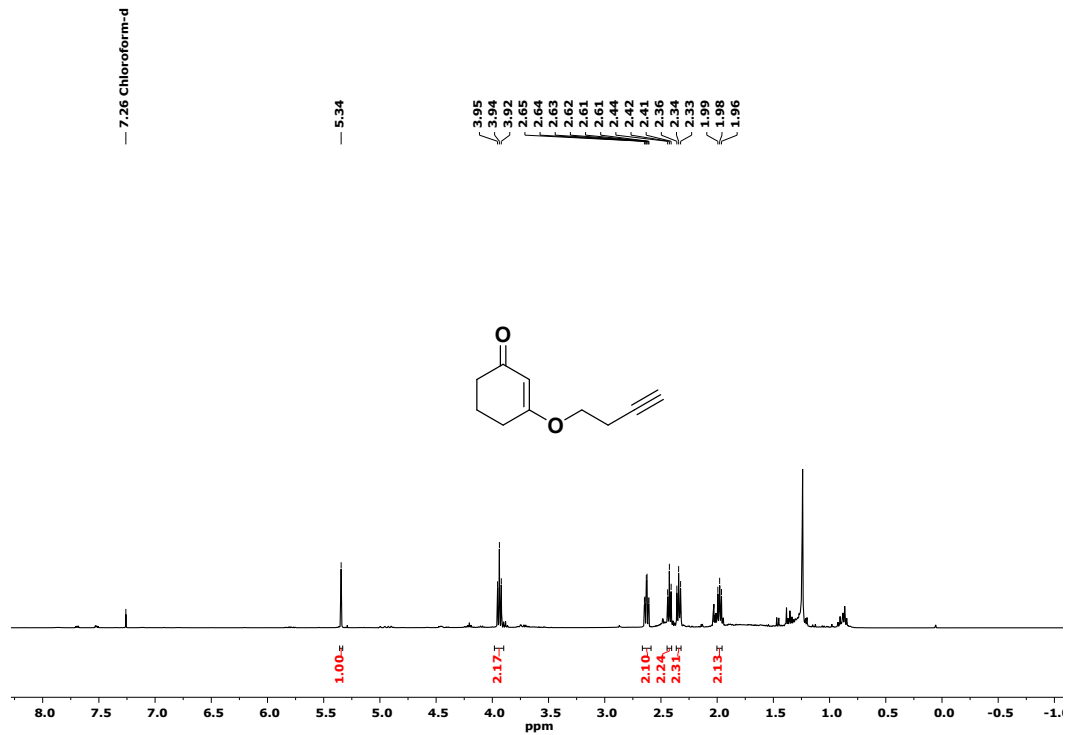

$^1\text{H}$  NMR of **2k**, 400 MHz,  $\text{CDCl}_3$

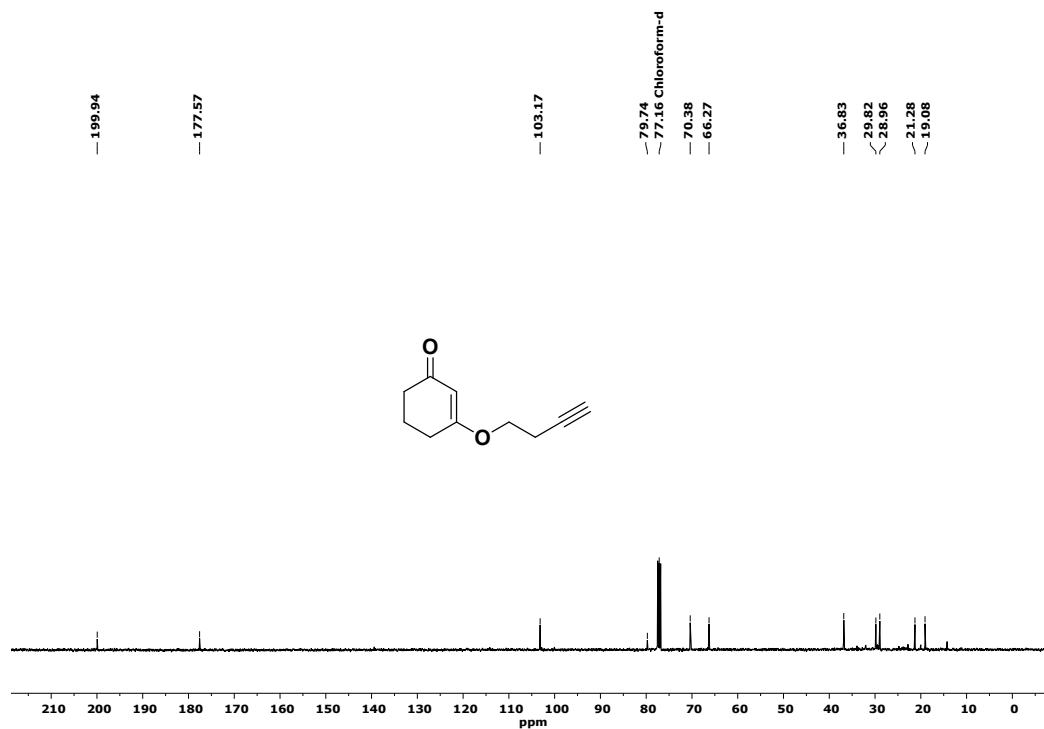

$^{13}\text{C}$  NMR of **2k**, 100 MHz,  $\text{CDCl}_3$

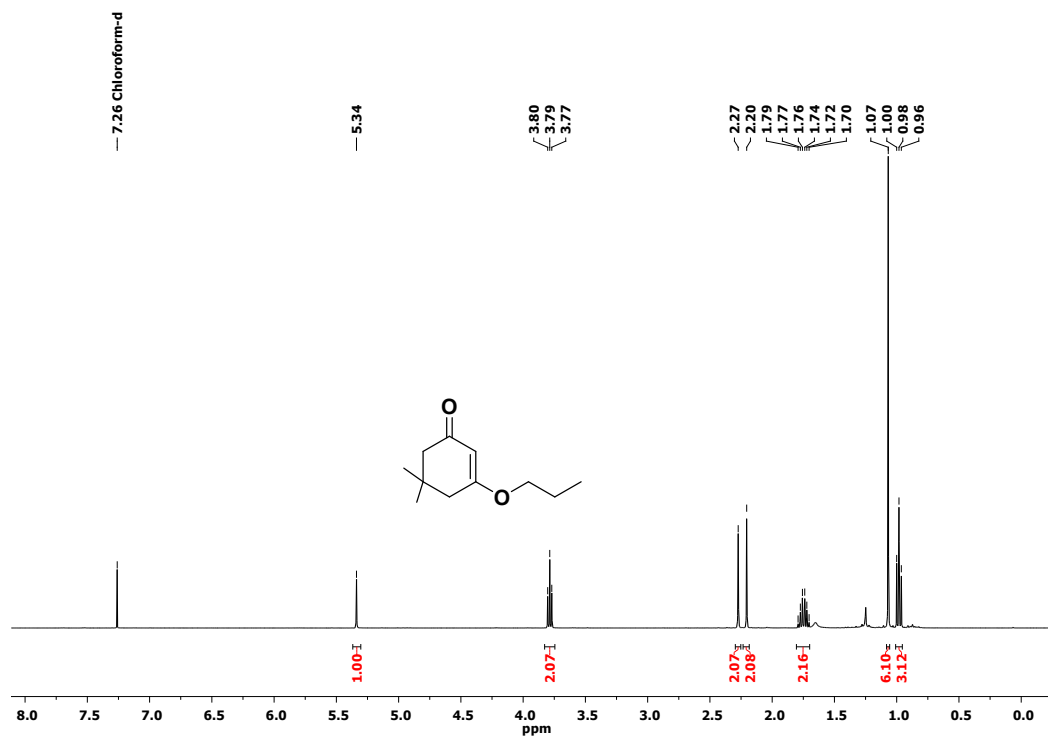

$^1\text{H}$  NMR of **21**, 400 MHz,  $\text{CDCl}_3$

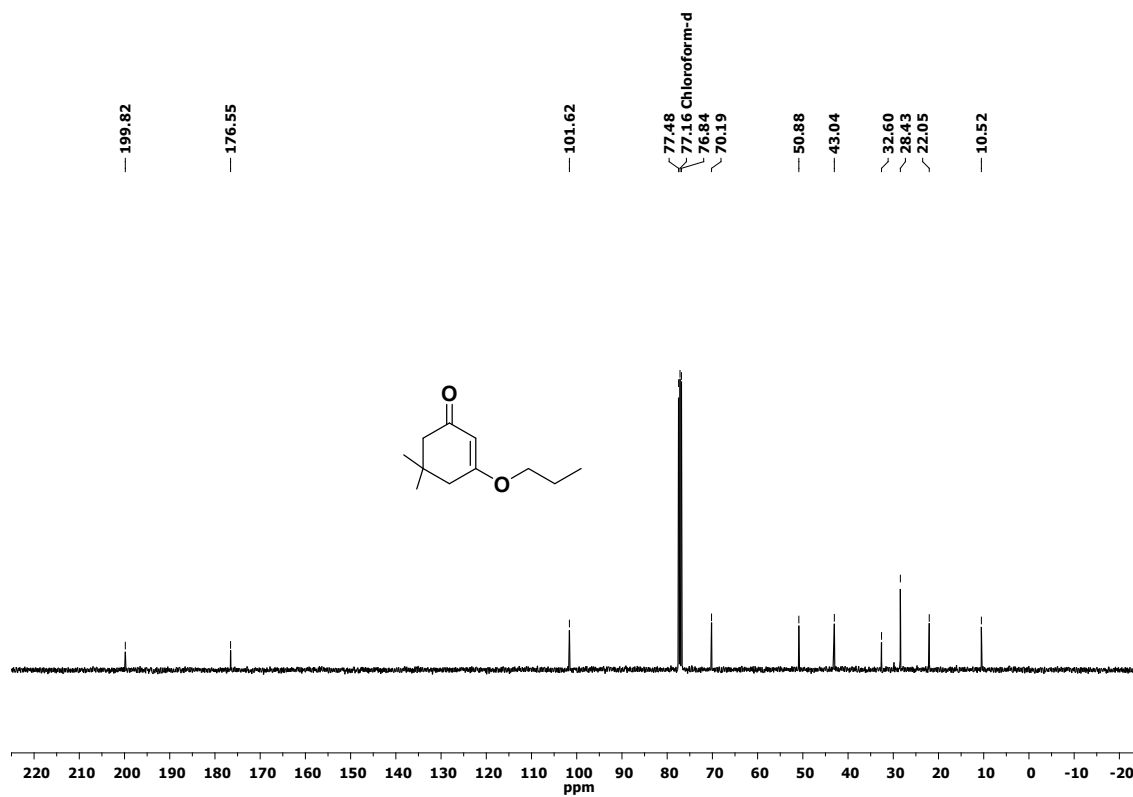

$^{13}\text{C}$  NMR of **21**, 100 MHz,  $\text{CDCl}_3$

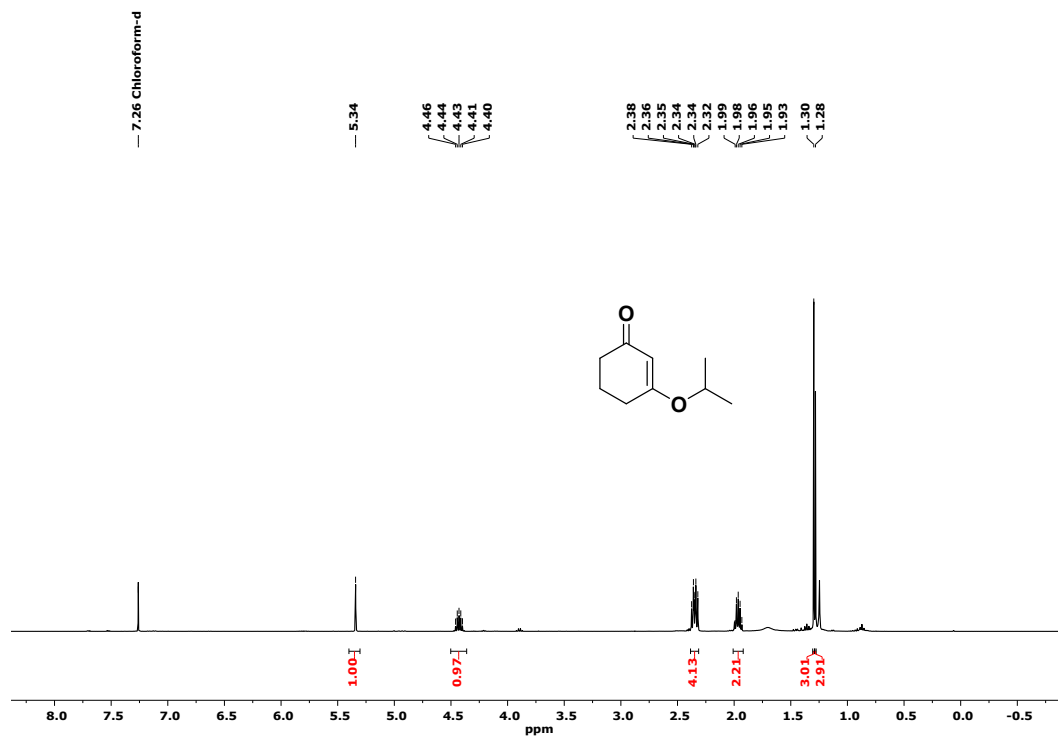

$^1\text{H}$  NMR of **2m**, 400 MHz,  $\text{CDCl}_3$

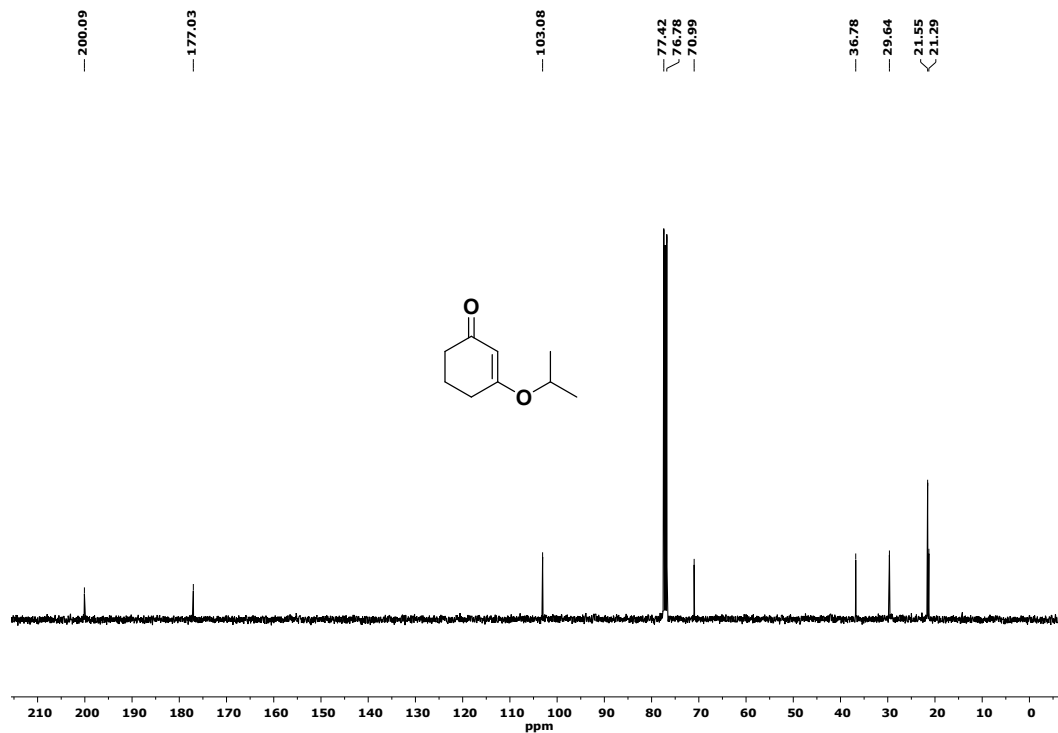

$^{13}\text{C}$  NMR of **2m**, 100 MHz,  $\text{CDCl}_3$

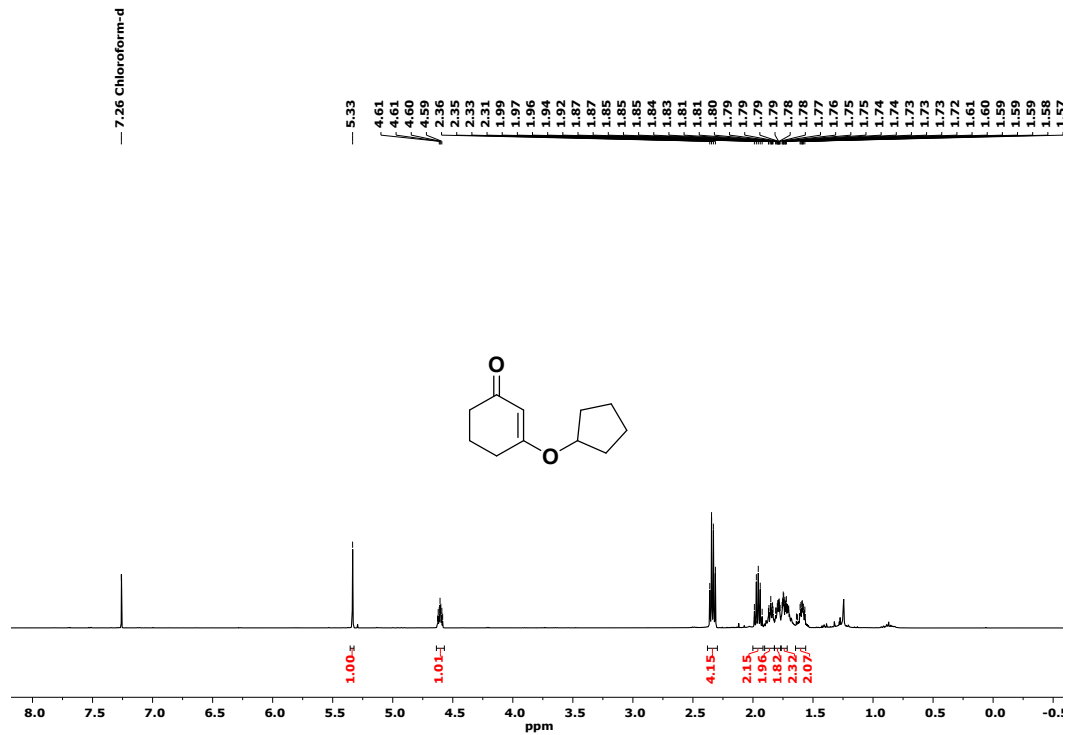

$^1\text{H NMR}$  of **2n**, 400 MHz,  $\text{CDCl}_3$

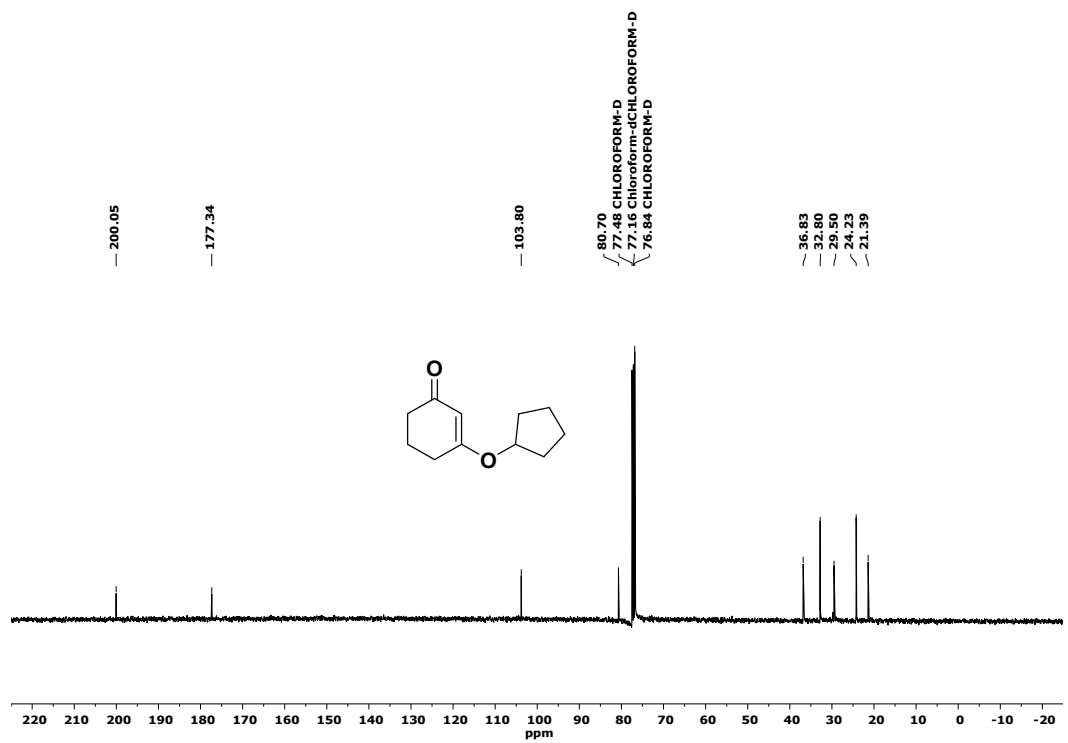

$^{13}\text{C NMR}$  of **2n**, 100 MHz,  $\text{CDCl}_3$



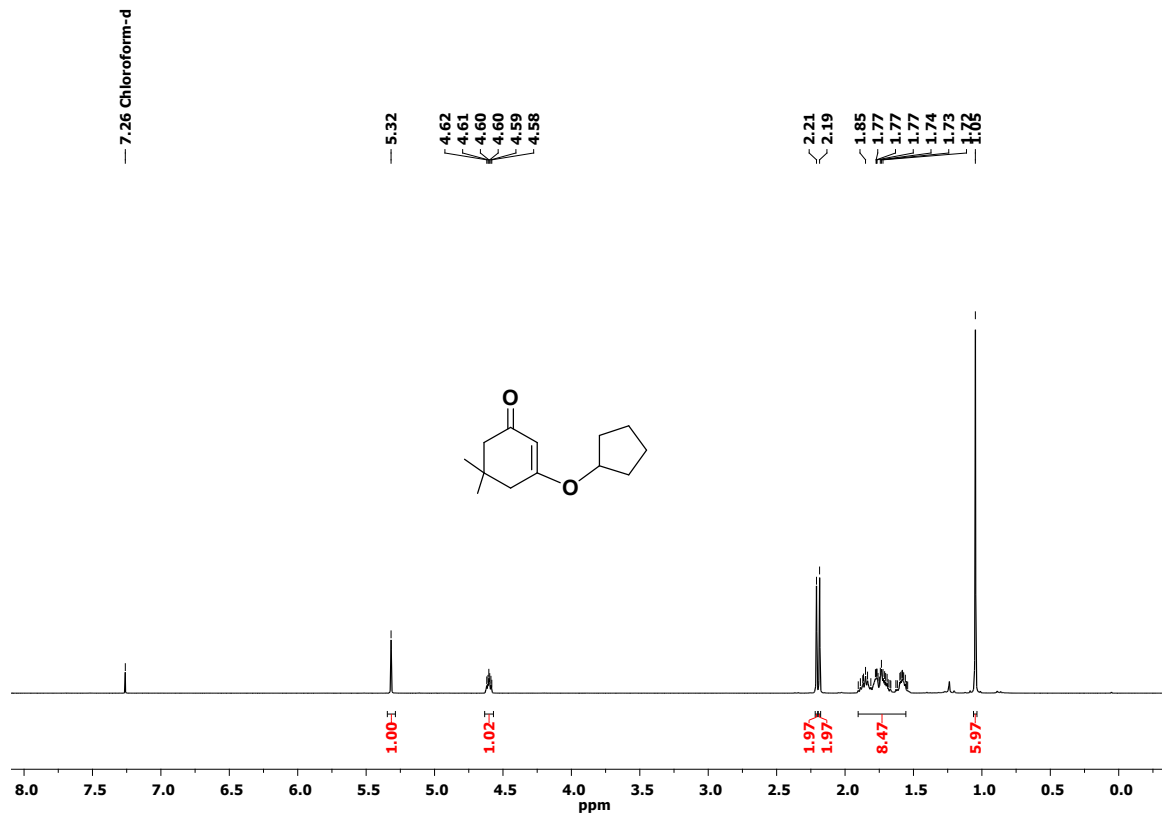

$^1\text{H}$  NMR of **2o**, 400 MHz,  $\text{CDCl}_3$

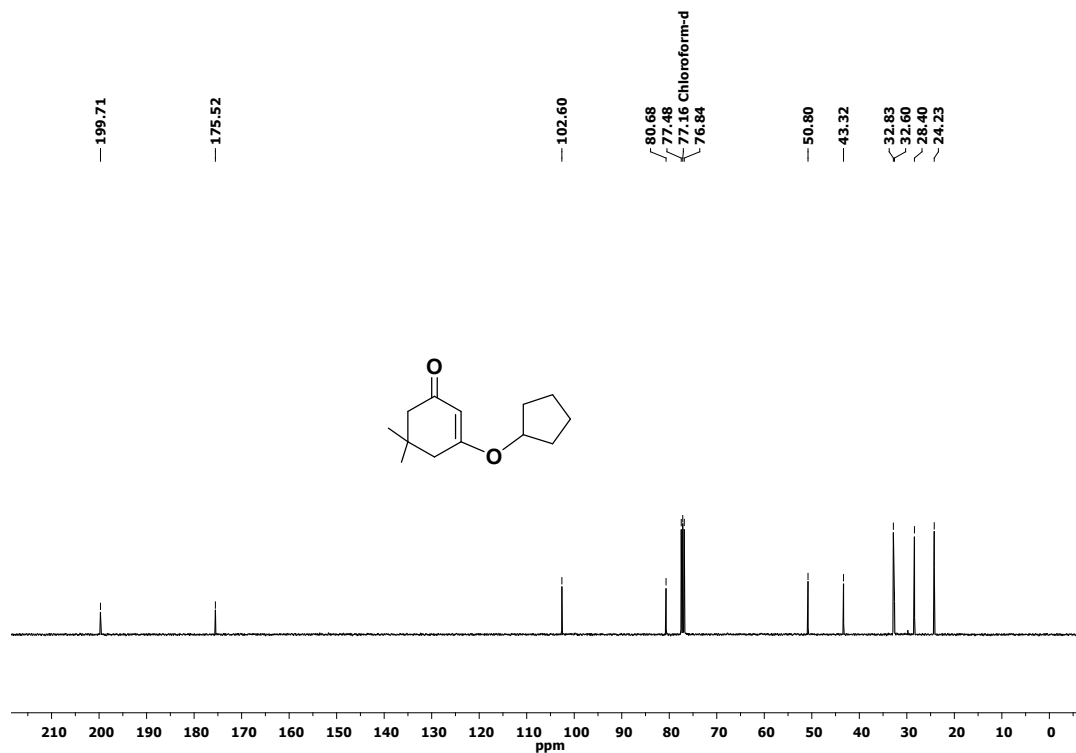

$^{13}\text{C}$  NMR of **2o**, 100 MHz,  $\text{CDCl}_3$

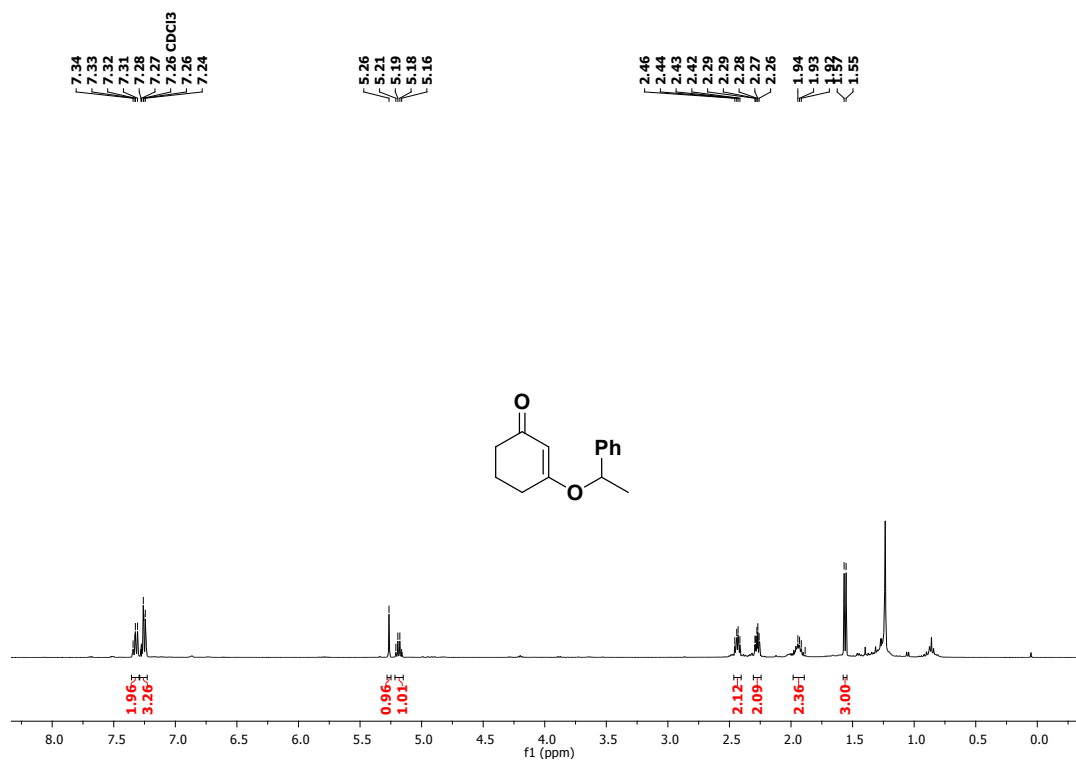

<sup>1</sup>H NMR of **2p**, 400 MHz, CDCl<sub>3</sub>

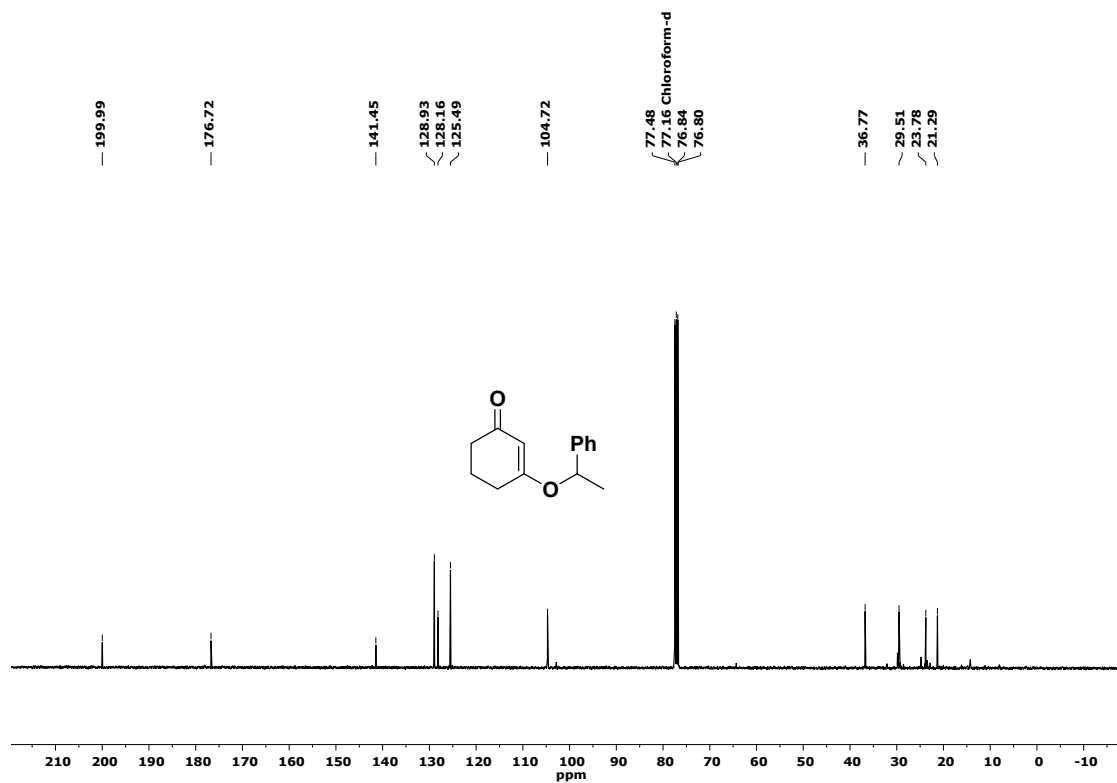

<sup>13</sup>C NMR of **2p**, 100 MHz, CDCl<sub>3</sub>

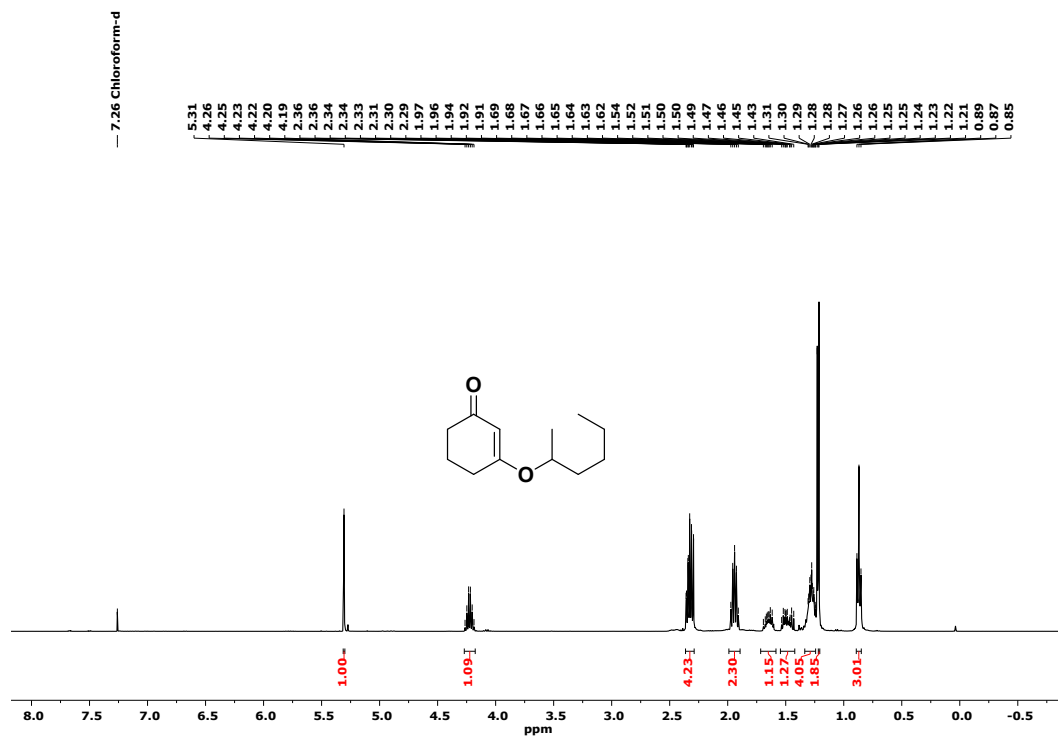

$^1\text{H}$  NMR of **2q**, 400 MHz,  $\text{CDCl}_3$

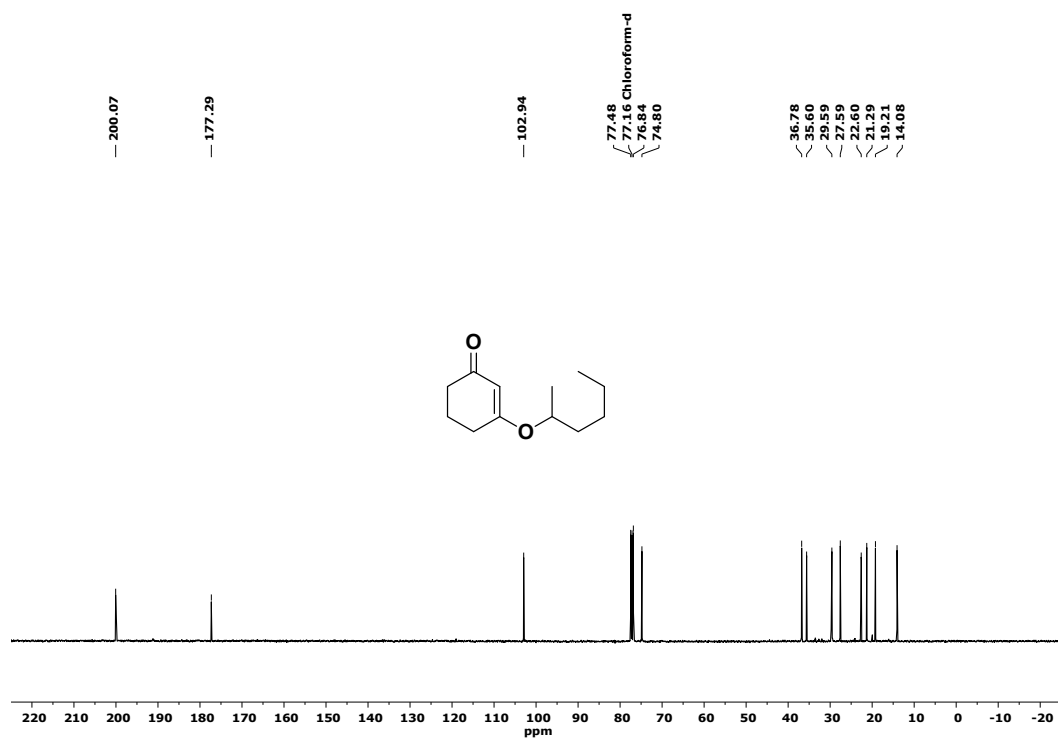

$^{13}\text{C}$  NMR of **2q**, 100 MHz,  $\text{CDCl}_3$

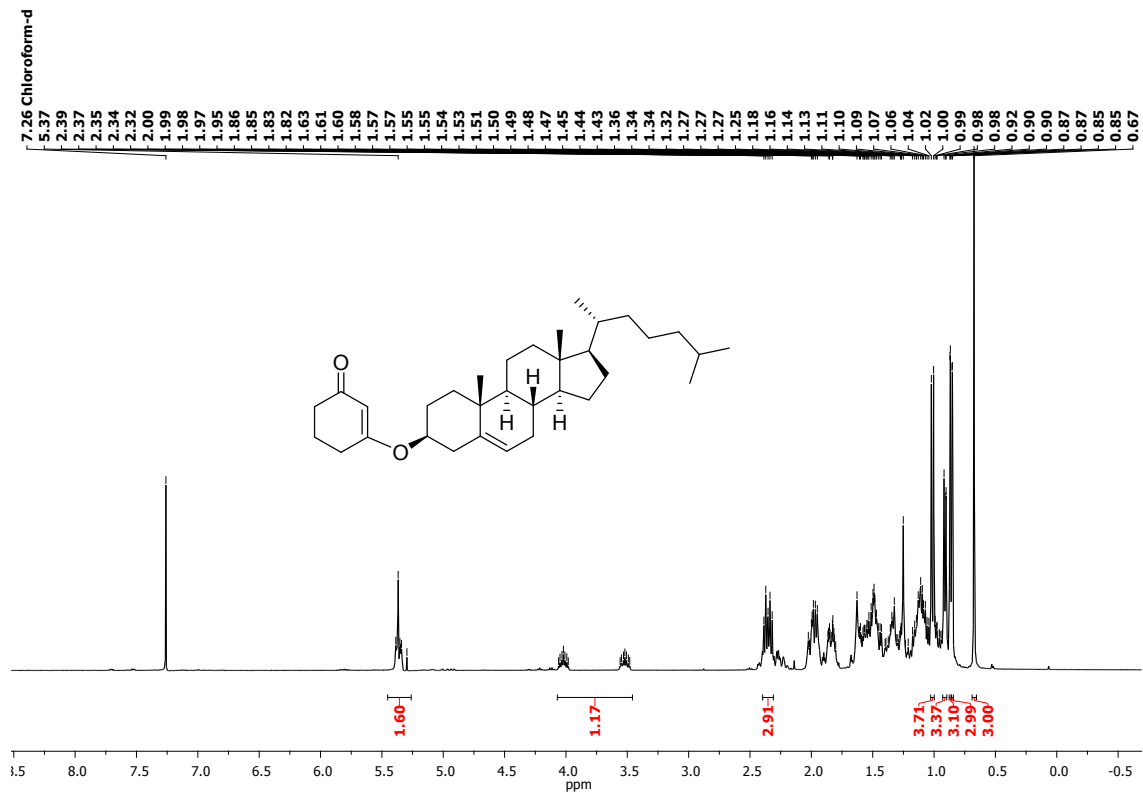

$^1\text{H}$  NMR of **2r**, 400 MHz,  $\text{CDCl}_3$

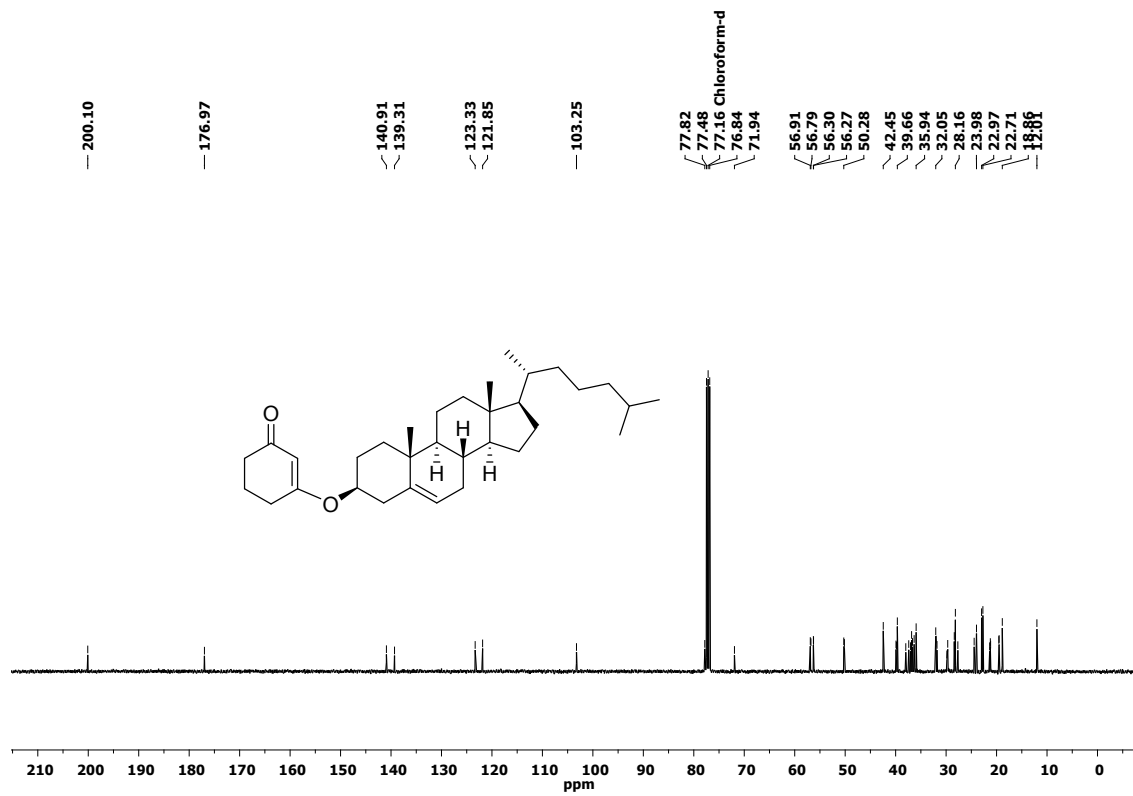

$^{13}\text{C}$  NMR of **2r**, 100 MHz,  $\text{CDCl}_3$

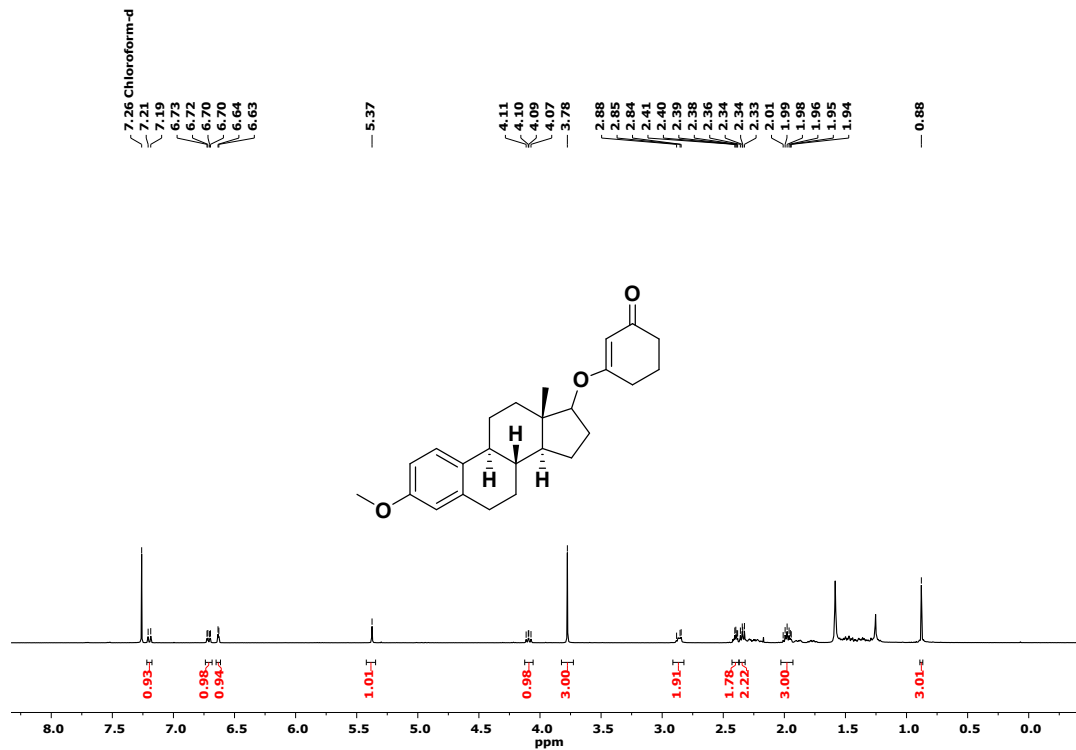

$^1\text{H}$  NMR of **2s**, 400 MHz,  $\text{CDCl}_3$

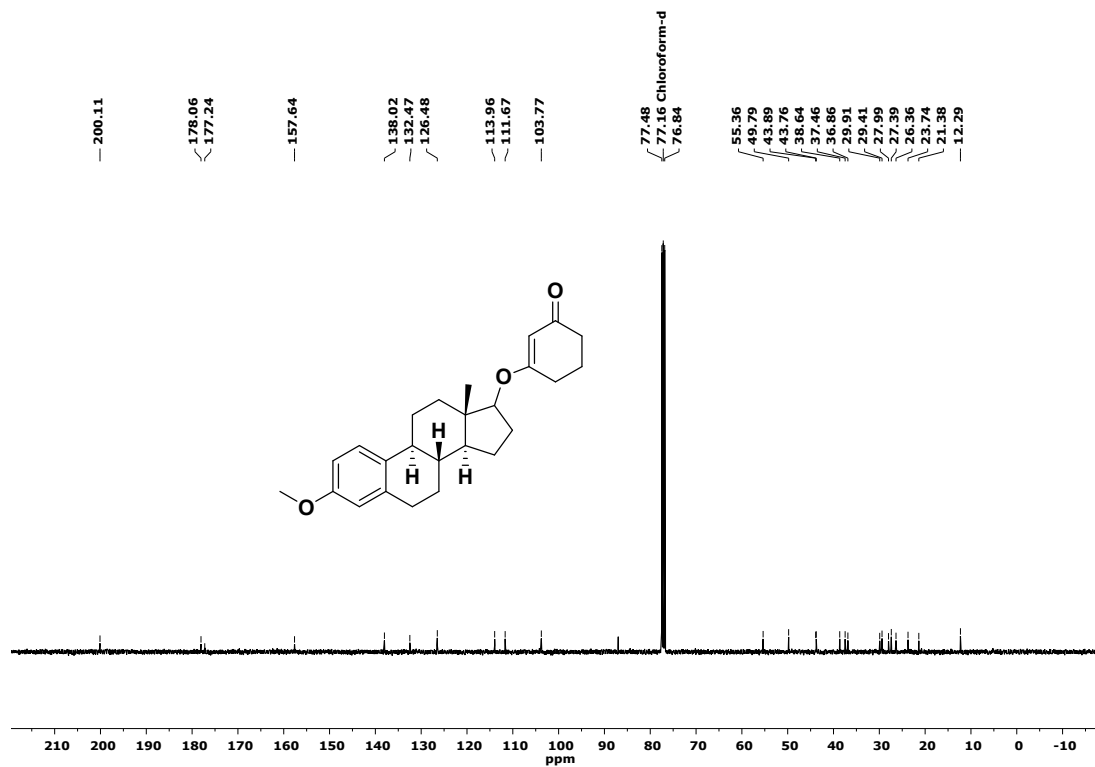

$^{13}\text{C}$  NMR of **2s**, 100 MHz,  $\text{CDCl}_3$

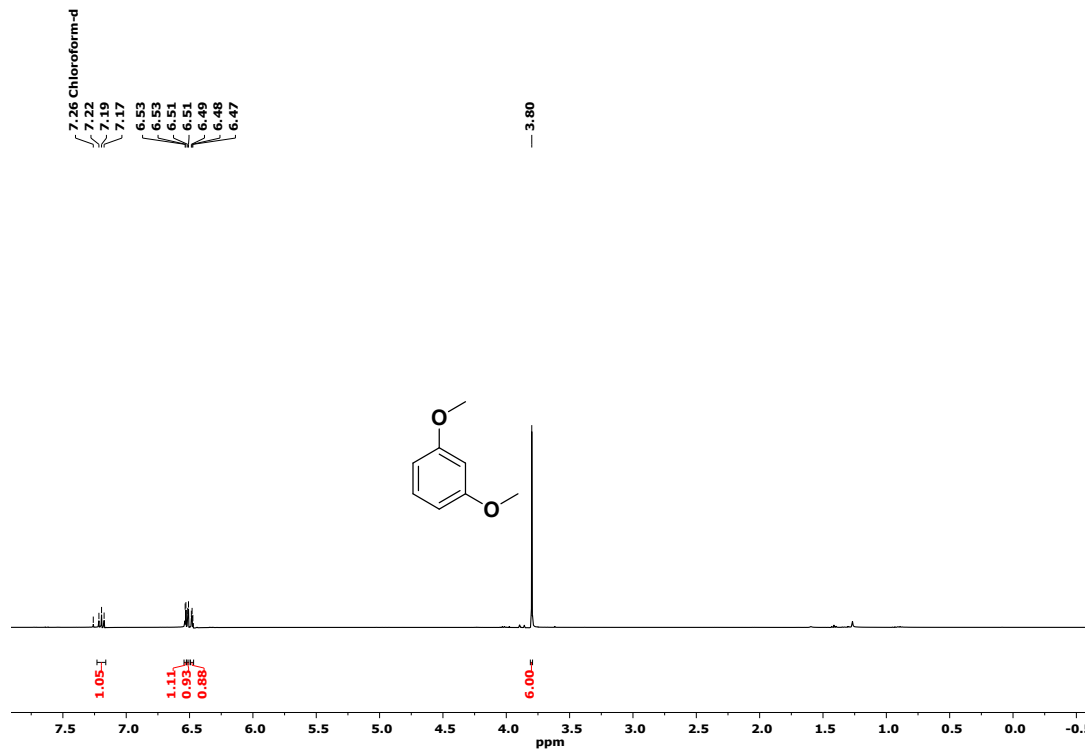

$^1\text{H}$  NMR of **3**, 400 MHz,  $\text{CDCl}_3$

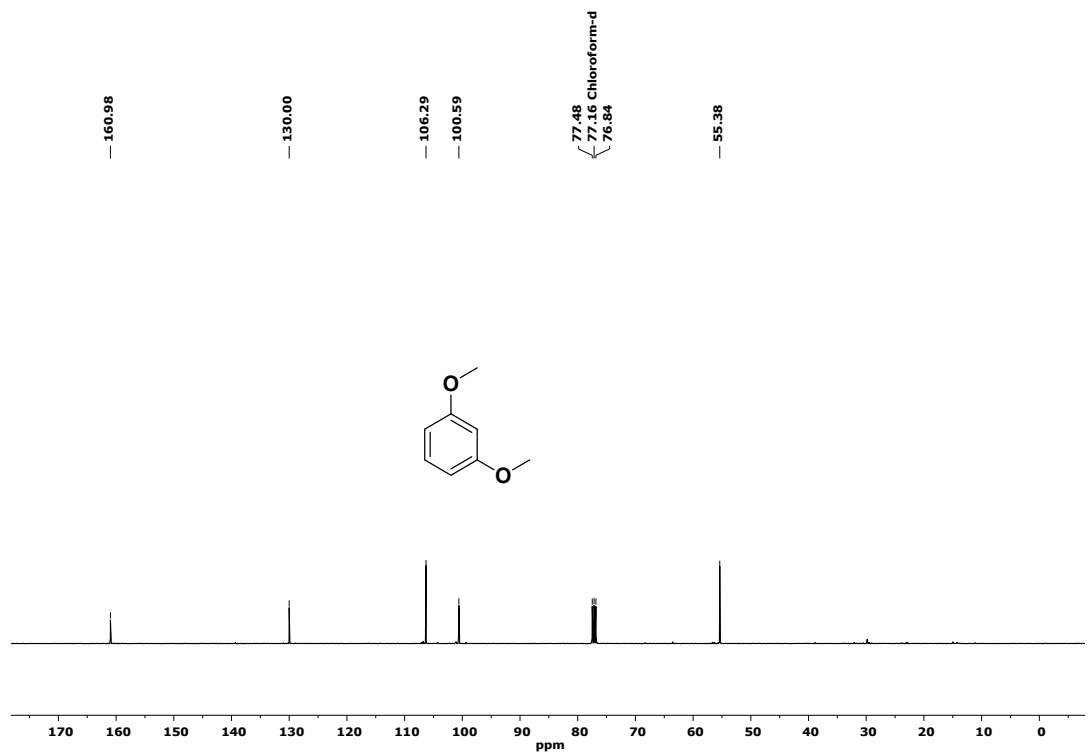

$^{13}\text{C}$  NMR of **3**, 100 MHz,  $\text{CDCl}_3$

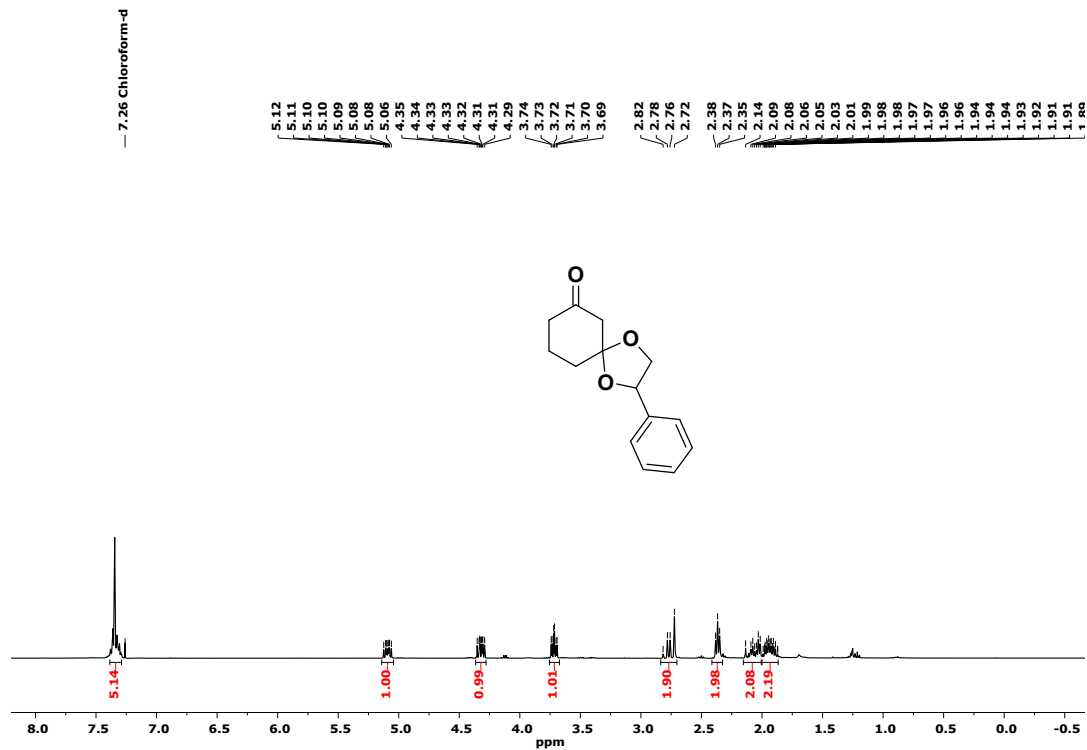

$^1\text{H}$  NMR of 4, 400 MHz,  $\text{CDCl}_3$

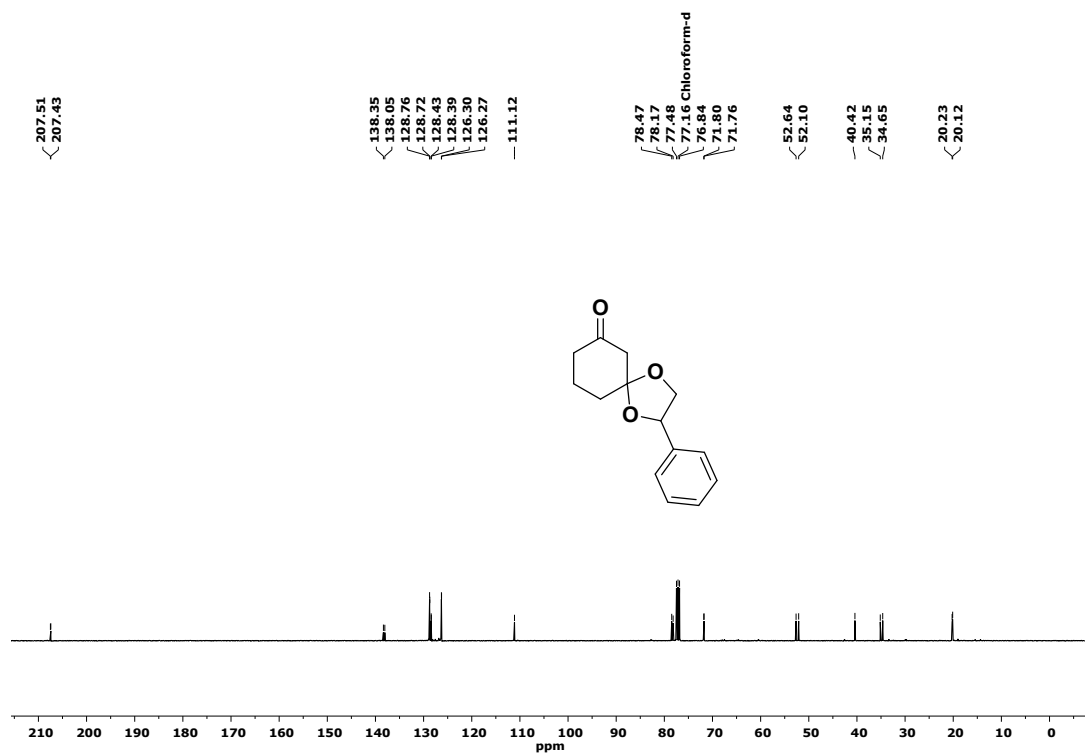

$^{13}\text{C}$  NMR of 4, 100 MHz,  $\text{CDCl}_3$

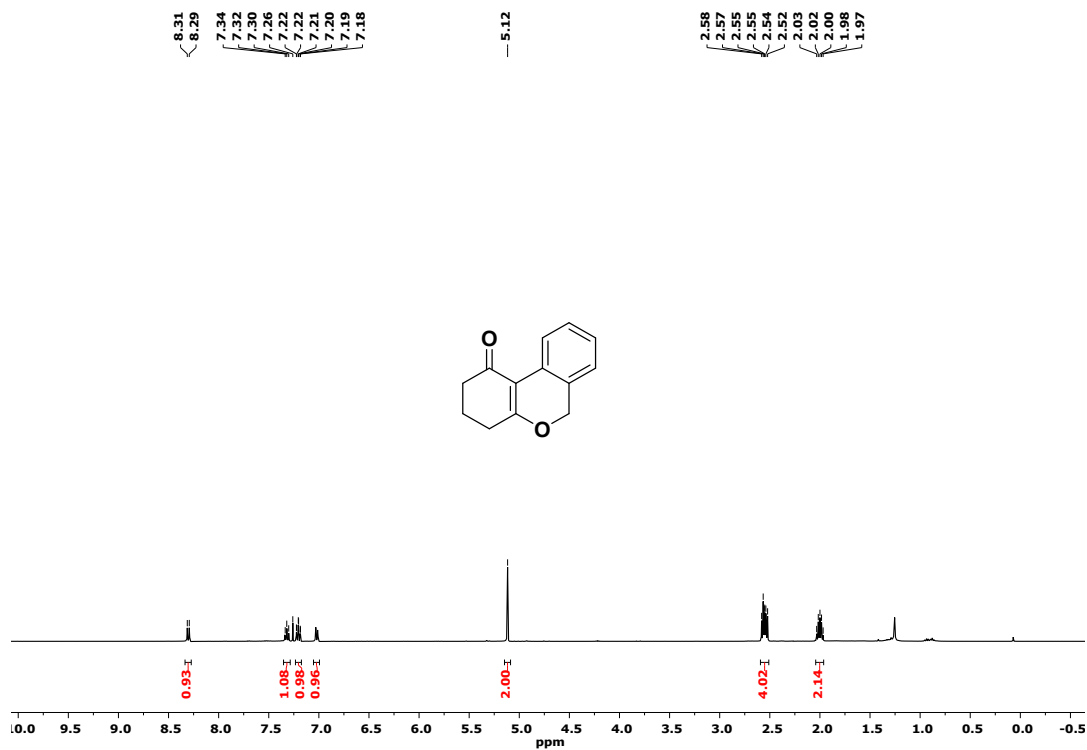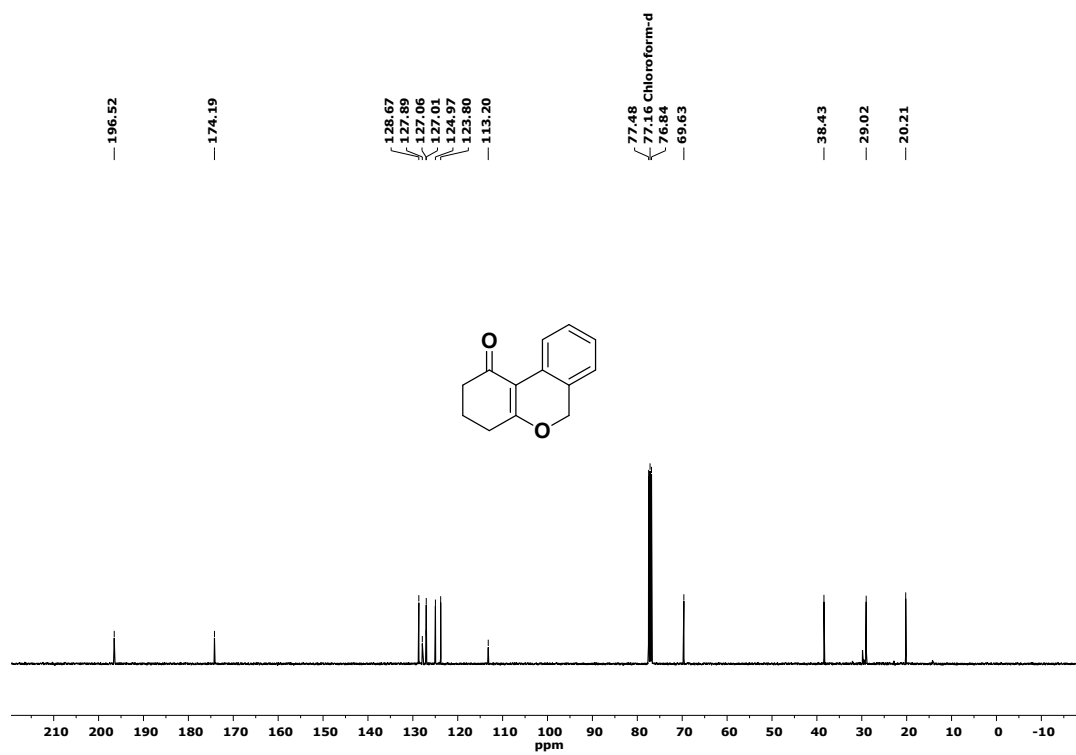

Supplement: c9ob00307j1.pdf [file c9ob00307j1.pdf]
